RESEARCH ARTICLE

# Consumers purchase intention in live-streaming e-commerce: A consumption value perspective and the role of streamer popularity

Qi Zhang<sup>1</sup>, Yuling Wang<sup>2\*</sup>, Shaizatulaqma Kamalul Ariffin<sup>3</sup>

**1** School of Foreign Languages and Literatures, Chongqing University of Education, Chongqing, China, **2** School of Languages, Literacies and Translation, Universiti Sains Malaysia, Penang, Malaysia, **3** Graduate School of Business, Universiti Sains Malaysia, Penang, Malaysia

\* [wyl0224@outlook.com](mailto:wyl0224@outlook.com)

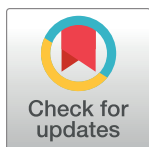

## OPEN ACCESS

**Citation:** Zhang Q, Wang Y, Ariffin SK (2024) Consumers purchase intention in live-streaming e-commerce: A consumption value perspective and the role of streamer popularity. PLoS ONE 19(2): e0296339. <https://doi.org/10.1371/journal.pone.0296339>

**Editor:** Mario R. Paredes, Universidad Del Rosario, COLOMBIA

**Received:** May 2, 2023

**Accepted:** December 11, 2023

**Published:** February 15, 2024

**Copyright:** © 2024 Zhang et al. This is an open access article distributed under the terms of the [Creative Commons Attribution License](https://creativecommons.org/licenses/by/4.0/), which permits unrestricted use, distribution, and reproduction in any medium, provided the original author and source are credited.

**Data Availability Statement:** All relevant data are within the paper and its [Supporting Information](#) files.

**Funding:** "This work was supported by the Two-way Synergistic Development Research Platform in Language Research and Application (Project No. 2021XJP06), the Disciplinary Construction Platform in Translation (Project No. 23XJXK08) at Chongqing University of Education. The funders had no role in study design, data collection and analysis, decision to publish, or preparation of the manuscript."

## Abstract

The rapid development of live-streaming e-commerce has driven billions of sales revenues and made customers' purchase intention a life-and-death issue for sellers. This study examines the influencing factors of customers' purchase intention from a value perspective by adopting and extending the Theory of Consumption Values (TCV). We also incorporated streamer popularity as a moderating variable to reveal its significant impact on live-streaming e-commerce. This study collected 457 valid online questionnaires from Chinese live-streaming e-commerce users. Our findings show that five of six consumption values, namely functional, social, emotional, conditional, and self-gratification value, are significant drivers of purchase intention. In addition, streamer popularity has strengthened the influence of functional, social, emotional, and self-gratification value on purchase intention. This study deepens the current understanding of live-streaming and customer value research by establishing and validating a comprehensive research model, and reveals the decisive role of multi-dimensional value and streamer popularity in live-streaming industry. The research findings could guide live-streaming merchants to increase sales by reallocating their resources to different consumption values and optimising their investment strategy in popular streamers.

## 1. Introduction

In recent years, live-streaming e-commerce has become a global economic and social trend that attracted growing attention. Since Walmart live-streamed its first shopping events on TikTok in December 2020, more and more retailers have partnered with platforms like Twitter, YouTube, and Facebook to hold live-streaming shopping events. In China, live-streaming e-commerce has also been adopted by leading e-commerce platforms such as Taobao and Jingdong, or content-sharing platforms such as Douyin and Kuaishou, creating an industry worth more than 200 billion US dollars [1].

manuscript." Please kindly make sure this information appear in the published article.

**Competing interests:** The authors have declared that no competing interests exist.

Live-streaming e-commerce integrates the online shopping process into a live-streaming context [2]. It is a hybrid of three salient functionalities of video content, real-time communication, and consumption [3,4]. Products exhibited in live-streaming are much more vivid and realistic than the traditional campaign through texts or pictures [5]. Viewers can have a closer look at the products and listen to the streamer introduce how the product works, feels or smells. They can also acquire a direct impression by watching how the product looks or works on the streamer [6]. In addition, live-streaming e-commerce has a real-time communication function [7]. Users can bring up questions or demands and will be immediately responded by streamers [8,9]. Recently, more and more celebrities have been invited to the broadcasting room to be the streamer and help to promote the products. Celebrity streamers' participation has further attracted millions of fans' attention and drives billions of sales revenue [10]. With all these advantages that come with live streaming e-commerce, consumers' purchase intention has been greatly stimulated [1,11]. Based on the report of Qianzhan industrial research institute [12], the total sales revenue of the Chinese live-streaming e-commerce industry has reached 195.2 billion US dollars by the end of the year 2020, and Taobao Live recorded a 24-hour sales revenue of 6.34 billion US dollars during 2020 Singles Day Shopping Festival (China's Black Friday) [13].

Along with the prosperity of the overall live-streaming industry, some problems could be seen behind the shining revenue numbers. A growing Matthew effect is emerging in the unbalanced performance among different platforms and streamers [1]. For example, in 2020, the total sales revenue of the top three live-streaming platforms, Taobao, Kuaishou, and Douyin, has reached 140 billion US dollars, taking up more than 70% of the entire industry. Meanwhile, the ten leading streamers have occupied 5% of the industry's revenue by creating 10 billion in sales [14]. Figure out how consumers' purchase intentions are formed would be conducive to the sustainable and healthy development of the entire live-streaming industry. Besides the growing unbalanced development, there is also an imminent problem of merchants' blind pursuit of popular streamers. To attract viewers and stimulate sales, an increasing number of celebrities and popular streamers are paid an astronomic commission for promoting products in live-streaming. Some of these endorsements have yielded worthy results, such as the most popular streamer on Taobao, Austin, has driven over 100 billion US dollars sales in 2022 [15]. On the contrary, some celebrities, despite their popularity and possession of millions of fans, are struggling with a poor sales record in live streaming e-commerce. Therefore, it is reasonable to ask how consumers' purchase intention is formed in live-streaming e-commerce. Why do consumers choose certain live-streaming merchants over others? Will the streamer's popularity influence the forming process of viewers' purchase intention? If so, through what mechanism will it exert an influence?

Despite the growing popularity of live-streaming e-commerce, it has so far received only limited attention in previous literature [3,16]. Existing studies have repeatedly employed the uses and gratification theory [17], affordance theory [18] or information success model [19] to examine users' behavioural outcomes, such as engagement [11,20], continued intention [16] or purchase intention [21,22]. However, most of these studies only consider external factors that influence users' behaviour, such as technical features, streamer characteristics or live-streaming content [1,18,23]. Studies that focus on the internal value-based perspective are relatively scarce [23]. Moreover, customer value studies in live-streaming only involve generic value dimensions, such as utilitarian value [11], hedonic value [1], or social value [16], without look into other value perspectives that have significant potential influence in the live-streaming context. Therefore, customers' perceived value in this specific research context remains unclear and requires deeper investigation [16].

Meanwhile, there is a trending phenomenon that an increasing number of popular celebrities have been invited as streamers [24], but not all celebrity streamers' contributions to product sales are worth their sky-high commission. It is still unclear how exactly these popular streamers influence viewers' decision-making process. Although celebrity endorsement has certain benefits, including increased customer attention, engagement or a more favourable attitude [25], previous studies on celebrity influence reveal that some famous celebrities, such as Britney Spears and Paris Hilton, are making some consumers buy less of the endorsed product [26]. Despite the complex nature of the problem, most prior studies in live-streaming have neglected celebrity endorser's impact on consumer behaviour. The underlying logic distinguishing viewers to cultivate different levels of purchase intention when provided with similar values remains unclear. Our study attempts to fill these gaps by examining purchase intention from a viewer's value perspective, also adopting streamer popularity as a moderator to uncover its influencing mechanism on viewers' purchase intention.

This study could enrich the extant live-streaming literature by exploring the determinants of viewers' purchase intention based on a multi-faceted value perspective. Specifically, this study adopts and extends the Theory of Consumption Values (TCV) by introducing self-gratification value as a new independent variable, which expands and increases its theoretical solidarity in this specific context. On the other hand, given that most existing live-streaming studies have neglected possible variations in celebrity streamers when examining the influence of users' value perceptions on their behaviour, this study enriches the existing literature by employing streamer popularity as a moderator to examine it as a boundary condition in driving purchase intention. Our research findings would help merchants and live-streaming platforms realise which consumption values are most decisive in driving customers' purchase intention and how streamers' popularity affects this process so that the merchants and platforms can effectively boost sales by positioning these values in their marketing campaigns and investing in celebrity endorsers more wisely under the guidance provided by this study.

The remaining of this study is organized as follows. Section 2 presents a comprehensive literature review of our topic. Section 3 proposes a research model with hypotheses. Section 4 introduces the research method, and Section 5 presents the empirical study results. Finally, section 6 presents the discussions and implications with limitations and suggestions for future research.

## 2. Literature review

### 2.1 Live streaming e-commerce

Live streaming e-commerce refers to a new selling method that enables the sellers to directly communicate and promote to shoppers through online live product demonstrations, product promotional activities, and real-time shopping guidance [27]. In comparison to traditional e-commerce, it integrates the live-streaming advantages of enhanced visibility, authenticity, and real-time communications into the online shopping environment, thus enormously stimulating consumers' buying behaviour [28]. We have summarized the recent studies on live-streaming e-commerce in Table 1. Most previous studies have been conducted to explore the features of live-streaming that would drive customers' usage behaviour [18,29]. Several distinctive characteristics of live-streaming have been identified, such as immersion [18,30], interactivity [31,32] or design features [30,33]. Comparatively, only limited studies have considered the value-based constructs that would lead to viewers' behaviour [23]. Stimulated by these features, there are mainly two behavioural outcomes of live-streaming e-commerce customers that have been discussed in prior studies. One of them is consumers' usage intention. Chen and Lin [34] identified that flow, entertainment, social interaction, and endorsement will motivate

Table 1. Empirical studies on live-streaming e-commerce.

| Authors                           | Theory                                                 | Antecedents                                                                                                               | Outcomes                                             | Involving Streamer Popularity |
|-----------------------------------|--------------------------------------------------------|---------------------------------------------------------------------------------------------------------------------------|------------------------------------------------------|-------------------------------|
| Yu et al. [37]                    | -                                                      | Viewer engagement                                                                                                         | Gift consumption                                     | N/A                           |
| Sun et al. [18]                   | IT Affordance Theory                                   | Visibility; Metavoicing; Guidance shopping                                                                                | Purchase intention                                   | N/A                           |
| Cai and Wohn [31]                 | Uses & Gratification Theory                            | Interaction enjoyment; Substitutability of personal examination; Need for community; Trend Setting                        | Watching; Purchase                                   | N/A                           |
| Wongkitrungrueng and Assarut [11] | Perceived Value Theory                                 | Utilitarian value; Hedonic value; Symbolic value                                                                          | Customer engagement                                  | N/A                           |
| Park and Lin [38]                 | Fit theory                                             | Wanghong-product fit; Live content-product fit; Self-product fit                                                          | Intention to buy                                     | N/A                           |
| Xu [28]                           | SOR Framework                                          | Streamer attractiveness; Para-social interaction; Information quality                                                     | Consumption; Social sharing                          | N/A                           |
| Hu and Chaudhry [6]               | Relationship Marketing Theory                          | Financial bonds; Social bonds; Structural bonds                                                                           | Consumer engagement                                  | N/A                           |
| Xue et al. [20]                   | SOR Framework                                          | Personalisation; Responsiveness; Entertainment; Mutuality; Perceived control                                              | Social commerce engagement                           | N/A                           |
| Quan et al. [39]                  | Para-social Interactions Theory, Attractiveness Theory | Relationship rewards; Self-disclosure; Affective interactivity; Informative interactivity; Amount of information provided | Purchase intention                                   | N/A                           |
| Hou et al. [3]                    | Uses & Gratification Theory                            | Interactivity; Social status display                                                                                      | Continuous watching intention; Consumption intention | N/A                           |
| Ma [19]                           | Information System Success Model                       | Information quality; Service quality; Argument quality                                                                    | Satisfaction                                         | N/A                           |
| Ma [40]                           | Uses & Gratification Theory                            | Perceived enjoyment; Perceived social interaction; Social presence; Perceived utility; Self-presentation                  | Live-stream shopping intentions                      | N/A                           |
| Singh et al. [16]                 | Perceived Value Theory                                 | Effort expectancy; Performance expectancy; Convenience value; Monetary value; Emotional value; Social value               | Continued intention                                  | N/A                           |
| Li and Peng [41]                  | Attachment and Flow Theory                             | Trustworthiness; Entertainment                                                                                            | Gift-giving intention                                | N/A                           |
| Meng et al. [42]                  | Emotional contagion theory                             | Pleasant; Arousal; Emotional trust; Admiration                                                                            | Purchase intention                                   | N/A                           |
| Kang et al. [43]                  | SOR Framework                                          | Interactivity (responsiveness, personalization)                                                                           | Customer engagement                                  | N/A                           |
| Li et al. [44]                    | Socio-technical theory, Attachment Theory              | Interaction; Identification; Synchronicity; Vicarious expression                                                          | Visit duration; User retention                       | N/A                           |
| Lu and Chen [45]                  | Uncertainty reduction                                  | Physical characteristic similarity; Value similarity                                                                      | Purchase intention                                   | N/A                           |

(Continued)

Table 1. (Continued)

| Authors           | Theory                                                       | Antecedents                                                                                                              | Outcomes                                          | Involving Streamer Popularity |
|-------------------|--------------------------------------------------------------|--------------------------------------------------------------------------------------------------------------------------|---------------------------------------------------|-------------------------------|
| Xu et al. [46]    | Information asymmetry theory, Parasocial relationship theory | Centricity; Professionalism; Commitment; Reciprocity                                                                     | Purchase intention                                | N/A                           |
| Guo et al. [1]    | -                                                            | Beauty; Warmth; Expertise; Humor; Passion                                                                                | Watching intention; Purchase intention            | Yes                           |
| Zhang et al. [47] | Socio-technical theory                                       | Active control; Synchronicity; Two-way communication; Personalisation; Visibility                                        | Continuance intention                             | N/A                           |
| Liu et al. [48]   | Motivation theory                                            | Socializing; Media engagement; Remuneration; Product examination; Relaxation; Entertainment; Self-development; Immersion | Behaviour intentions; User satisfaction           | N/A                           |
| Chen and Liao [5] | Social presence theory                                       | Sense of community; Emotional support; Interactivity                                                                     | Watching intention                                | N/A                           |
| Zheng et al. [49] | Flow theory                                                  | Social presence; Interactivity; Attractiveness; Expertise                                                                | Continuous watching intention; Purchase intention | N/A                           |
| Liao et al. [7]   | Parasocial interaction theory, Flow theory                   | Communication style; Immersion; Parasocial interaction                                                                   | Purchase intention                                |                               |
| This study        | Theory of Consumption Values                                 | Functional value, social value, emotional value, epistemic value, conditional value, self-gratification value            | Purchase intention                                | Yes                           |

<https://doi.org/10.1371/journal.pone.0296339.t001>

consumers' usage intention in live-streaming service. Similarly, Sjöblom and Hamari [35] revealed that viewers' usage intention is driven by social connection, emotional factors, and stress release. Customer engagement is another widely discussed outcome of live-streaming e-commerce [36]. Xue et al. [20] found that live interactions would drive customer engagement through increased perceived usefulness and decreased risk. Continuing to examine customer engagement, Hu and Chaudhry [6] demonstrated a tight connection between relational bonds and live-streaming users' engagement.

In this study, we consider viewers' purchasing intention as the primary concern and ultimate target desired by live-streaming e-commerce sellers [49], since profitability can only be achieved through sales performance [50]. Although a few studies have shed light on the purchase intention in live-streaming e-commerce, most of them are either tend to explain viewers' purchase intention through technical features, such as interactive functions [37], enhanced product presentation [51] and IT affordances [18], or try to predict purchase intention from the streamer's standpoint, such as streamers' appeal [3], streamers' characteristics [1], or streamer-product fitness [52]. Limited studies have tried to explain purchase intention from the viewer's perspective. This study differed from previous research by arguing that viewers are the primary subject of purchase intention, and it is the viewers who will make the final purchase decision in live-streaming shopping. Therefore, this study attempts to approach purchase intention from the viewers' standpoint and examine the values that would drive their purchase intention.

## 2.2 Customer perceived value and theory of consumption values

**Customer perceived value.** The concept of customer perceived value has always played a central role in customer behavioural studies [53,54]. It is usually described as a trade-off between quality and price by empirical researchers [55]. Zeithaml [56] brought up the most commonly used and widely spread definition of perceived value as users' evaluation of a product's performance based on their assessment of what is gained and what is given.

The concept of value has been widely recognised as the foundation of plentiful theories and disciplines in human cognition and behaviour [57]. Value could influence human behaviour [58], as people utilize values to decide and rationalize their actions [59]. Thus in the business field, the concept of value is also deemed as the basis for differentiating and guiding consumer behaviour [60] and plays a vital role in marketing and consumer behaviour studies [61]. It has been used to explain the motivation of customers' choice behaviour [62], behavioural intentions [63,64], purchase intentions [65,66], adoption behaviour [67,68] and continuance behaviour [69,70]. More recently, value has also been depicted as the basis for differentiating companies from competitors and the key to establishing sustainable competitive advantage [71].

There are two major approaches to conceptualizing perceived value in previous literature: the uni-dimensional and the multi-dimensional approach [72,73]. The uni-dimensional approach regards value as an essentially utilitarian concept, which is formed based on the price and benefits that are eventually received in terms of functionality [74]. However, this approach is accused of simplifying the consumer's perception of value by considering just price and quality [75]. Therefore, the inability to capture the comprehensive essence of perceived value leads to the inability to gain a competitive advantage [73,76]. Moreover, this approach has neglected the distinctive invisible, innate, and affective factors of the perceived value [77]. Therefore, compared with the uni-dimensional approach, more studies tried to catch the essence of value using a multi-dimensional approach [75,78–81]. Accordingly, this study will adopt a multi-dimensional value approach to apprehend customer perceived value in a live-streaming context.

**Theory of consumption values.** The theory of consumption values (TCV) was brought up by Sheth et al. [79] to explicate a basic question in the marketing area of how customers choose among different products or services. It proposes that consumers' decision is made based on the integrated functioning process of five different consumption values. In the meantime, every single value has a separate and varying impact under a particular circumstance [79]. The publication of TCV has offered a useful tool for the following researchers in customer value [82,83]. It has been successfully adopted and expanded to various contexts to theorise consumers' behaviour, including information systems [83,84], green products [85,86], mobile-based services [87] or tourism [74,81]. In the live-streaming background, Singh et al. [16] adopted TCV to assess the determinants that drive the continued use of live-streaming service, and they defined perceived value as the live-streaming service's overall utility value that a customer perceives based on the cost-benefit trade-off. Their research proposed four dimensions to measure perceived value and found that perceived value is a prominent driver of customers' continued intention. In the digital media context, Chakraborty et al. [88] examined users' repurchase intention by adopting TCV. Their empirical study identified five values to have a significant influence on building trust and repurchase intention. Continuing to adopt the value theory, Wongkitrungrueng and Assarut [11] examined the influence of perceived value on customer engagement. Their study revealed that utilitarian, hedonic and symbolic value are positively related to trust and engagement in live-streaming social commerce sellers.



Although those prior live-streaming research have discussed the importance of perceived value in motivating consumers' behaviour [36], our study takes the analysis further by considering extra contextual value dimension and boundary condition that might affect the value-behaviour relationship. A more comprehensive multi-dimensional value perspective would provide a more robust measurement of customers' evaluation in explaining their purchasing behaviour [11,62], and it is considered appropriate in the live-streaming e-commerce context for several reasons: First, Viewers choose to buy from live-streaming due to multiple perceived values [16]. For instance, viewers could acquire functional value from vivid live product exhibition [1]; Emotional and social value could be perceived after interaction with popular streamers and other audiences [89]; Epistemic value is well received when trending information about new products are introduced, and conditional value could be influential when viewers get the best discount for buying the products [48]. Second, as a nascent business phenomenon, live-streaming e-commerce could provide customers with an unprecedented shopping experience by infusing entertaining and immersive factors into the shopping process [18,90]. Viewers are motivated to watch and buy from live-streaming e-commerce to reduce their tension and maintain inner equilibrium, also known as self-gratification value [91,92]. Therefore, generic value dimensions adopted in previous studies, such as utilitarian, hedonic or social value [1,11], might be inadequate to capture live-streaming customers' value perception. Third, a value-based study is needed in China since consumers from middle-income countries tend to compare the values after using a service and drive their decisions [16]. Although several live-streaming studies have been conducted in China to examine consumer behaviour [18,22,44], few of them adopted a multi-dimensional value perspective to study viewers' purchase intention. Based on these discussions, it is necessary to explain customers' behaviour in live-streaming e-commerce based on a more comprehensive multi-faceted value perspective, and examine what values will eventually lead to viewers' purchase intention [36,62].

### 2.3 Streamer popularity in live streaming e-commerce

Celebrity endorsement has long been recognized as an effective promotional strategy in the business world [93,94]. Previous studies have found that celebrity endorsement would profoundly influence consumers' behaviour by transferring their preconceived positive image of a celebrity endorser to the endorsed product or brand [25]. Extant literature indicates that one in four advertisements is with celebrity endorsers [95,96]. Traditionally, Celebrity endorsers are referred to as a group of people who are publicly known because of their achievements in certain fields, usually in the category of famous actors, athletes, models, or singers [97]. Nowadays, driven by the lightening expansion of information technology and social media networks, consumers are more likely to be exposed to new types of celebrities or influencers [98], and the definition of a celebrity has been expanded [25]. "Ordinary" people are becoming "online" celebrities or "internet" micro-celebrities [99] and reach millions of followers on various platforms [98]. Various online celebrities have developed increasing social impacts on their large number of followers [100,101].

Nowadays, Live-streaming merchants are trying to make use of these celebrities' influence by paying a large amount of money to invite them to join or host the online streaming show and promote products [102,103]. In this way, these celebrity streamers are becoming both product consumers and advertisers. They can promote the product to their followers in an instant two-way interactive environment, making the endorsement more natural and reliable [104]. With the advantages of both popularity and technology, celebrity streamers in e-commerce are more influential, persuasive, and powerful in influencing consumers' behaviours

[98]. As a result, online celebrities' participation in live-streaming e-commerce has significantly stimulated sales and boosted the growth of the whole industry [25,105].

The streamer's popularity refers to their ability to attract people's preference to watch their online streaming shows [1]. It is usually reflected by their followers' size and it is the key source of streamers' competence in live-streaming e-commerce [98]. Streamers can be classified from nano endorsers with hundreds of followers to mega endorsers with millions of followers [106]. Previous studies indicate that endorsers with greater popularity usually lead to a larger influence on consumers' behaviour [106]. Such as De Veirman et al. [107] revealed that users react more positively to Instagram influencers who have a larger number of followers; Jin and Phua [101] also corroborated that customers are inclined to choose products promoted by those endorsers with a higher number of followers on Twitter. These findings intuitively sound reasonable because people like to consider the number of followers as a decisive parameter in assessing advertising information [106,108]. This linear relationship between popularity and influence is also consistent with the logic of the popularity principle, which claims that the more followers an endorser has, the wider a message would reach, and a larger impact on consumers would be generated [106]. However, the impact of celebrity popularity on consumers' behaviour may not be as straightforward as it seems and still needs to be further clarified [106,108]. A public research conducted in Dutch indicates that product endorsers who run in a small but accurate way are more likely to win customers' trust [109]. In the live-streaming context, several studies have also found that streamer popularity is unrelated to their advertising outcomes [110,111]. Moreover, based on the 2020 Live-Streaming E-commerce Industry Report [14], there is no clear evidence that supports the positive connection between follower size and viewers' purchase intention. Based on these mixed findings, this study attempts to find out how streamers' popularity would interact with the influence of value on consumers' behaviours by proposing it as a moderating variable.

### 3. Research model and hypothesis

The research framework is illustrated in Fig 1. This model presents a multi-dimensional value concept to examine the influencing factors of customers' purchase intention in the live-streaming e-commerce context. Streamer popularity is incorporated to explore its influence on the forming process of customer purchase intention. The research model consists of six independent consumption value variables (functional, social, emotional, epistemic, conditional, and self-gratification value), a dependent variable purchase intention, a moderating variable streamer popularity and five control variables of gender, age, occupation, income and live-streaming platform.

#### 3.1 Functional value and purchase intention

Functional value in TCV is described as a product or service's value that is related to its salient functional attributes and is reflected in its physical performance [83]. In live-streaming, functional value is acquired from its salient functionalities, such as the lively exhibition of the product, real-time response to customers' requests, and a convenient check-out system [6,9]. Functional value is found to be a crucial consumption value that drives consumers' behaviour in various IS contexts [112], such as online shopping [113,114], mobile banking [82] or mobile application [115]. In live-streaming e-commerce, Yu and Zheng [36] suggested that a real-time exhibition of jewellery's wearing effects could help make customers convinced by its functional performance, which significantly drives their purchase behaviour. Guo et al. [116] also demonstrated that an abundant amount of product-related knowledge, information and hands-on usage experience would be transferred to viewers in the live-streaming environment,



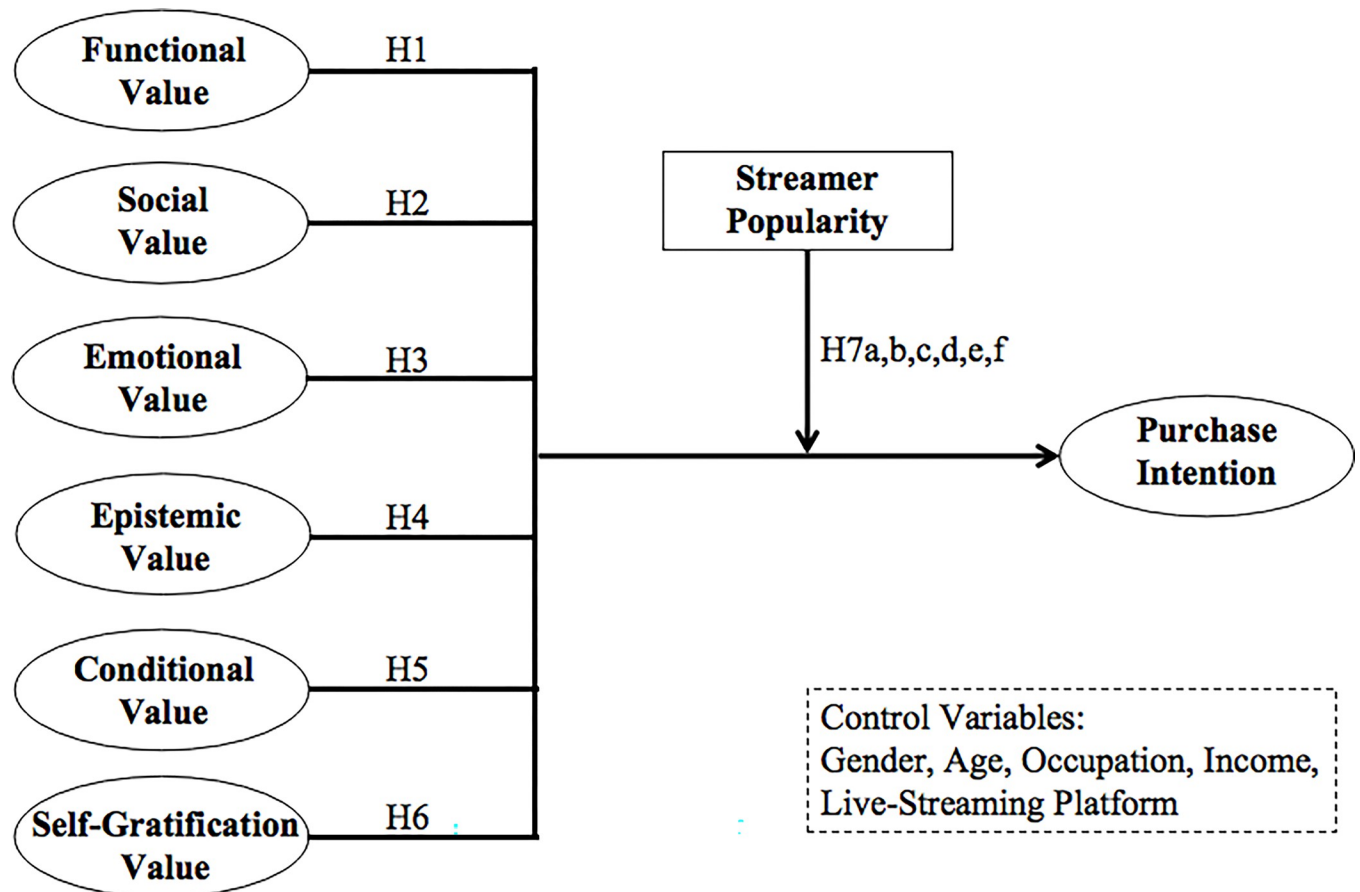

Fig 1. Theoretical framework.

<https://doi.org/10.1371/journal.pone.0296339.g001>

thus allowing them to perceive higher functional value and drive their purchase intention. Similarly, Zhang et al. [117] found that strengthened knowledge sharing quality would positively influence customers' sense of virtual community and increase customer-brand relationship. Based on the preceding discussions and literature, we postulate:

H1: Functional value positively influences customers' purchase intention in live-streaming e-commerce.

### 3.2 Social value and purchase intention

Social value denotes a merchandise's utility in improving users' image among their social connections and networks [79,118]. Live-streaming e-commerce provides a social platform where the viewers can share their ideas, reviews or feedbacks to guide their purchase decision [16]. The viewers in the same broadcasting room serve as a social reference group and potentially persuade its members to purchase or behave according to some latent standards established among them [115]. Social value is obtained during this process when live-streaming consumers evaluate the reactions of other viewers, and if a brand would be considered acceptable among their social networks [11]. Prior literature has found a positive influence of social value on consumers' purchasing behaviour [119,120]. In the live-streaming context, Yu and Zheng [36] found that consumers' social status and personality could be highlighted in live-streaming

shopping, further stimulating their purchase intention. Wongkitrungrueng and Assarut [11] also suggest that live-streaming customers could assign certain social symbolic meanings to their purchase process and use it to guide their consumption behaviours. Therefore, this study hypothesises:

H2: Social value positively influences customers' purchase intention in live-streaming e-commerce.

### 3.3 Emotional value and purchase intention

Emotional value is the ability to stimulate consumers' affective feelings or emotional states [79,121]. Mirror in the live-streaming e-commerce context, the emotional value reflects the ability of live-streaming e-commerce to stir up the viewers' feelings or affective states [1]. Live-streaming's interactive feature enables retailers to arouse viewers' emotional pleasure in various ways [11]. For example, viewers could be entertained by participating in streamers' online games or feel excited if they earn a special gift during the live-streaming [3]. This entertainment and excitement can be the core in forming a positive emotional feeling that drives people to use and purchase in live-streaming e-commerce. Guo et al. [1] stated that live-streaming e-commerce could create a sense of enjoyment and excitement, and these emotional feelings will significantly drive customers' purchase intention. Hou et al. [3] also demonstrated that viewers could perceive emotional affection from the entertaining usage experience of live-streaming e-commerce and eventually shape their consuming behaviour. Therefore, we posit:

H3: Emotional value positively influences customers' purchase intention in live-streaming e-commerce.

### 3.4 Epistemic value and purchase intention

Epistemic value is related to consumers' variety and novelty-pursuing ideas or needs for knowledge that a particular merchandise satisfies [122]. Streamers constantly introduce interesting products with novel designs and characteristics that fulfil viewers' variety and novelty-seeking intentions [3]. Meanwhile, facilitated by the real-time interactive feature of live-streaming, viewers' can gain more comprehensive knowledge about the products by bringing up questions and doubts or asking streamers to introduce the product in their preferred way. Previous IS research has found a positive connection between epistemic value and consumers' behaviours [123,124]. Qian et al. [125] also demonstrated that epistemic value in live-streaming service would significantly influence viewers' purchase intention and engagement. To this end, this study proposes:

H4: Epistemic value positively influences customers' purchase intention in live-streaming e-commerce.

### 3.5 Conditional value and purchase intention

Conditional value is perceived when a product or service meets consumers' demands in specific context settings [126]. Conditional value in live-streaming e-commerce is well perceived by consumers, when streamers give discounts or coupons during their live shows and claim these promotions are only given to viewers watching at this moment. In addition, when celebrity streamers are involved in live-streaming, viewers can acquire extra conditional value from the interaction and engagement with those celebrities [127]. Although only limited studies have explored conditional value in the live-streaming e-commerce context, previous literature

has demonstrated that conditional value has a significant influence on purchase behaviour in online service [81], mobile applications [121], or online games [128]. Therefore, we hypothesise:

H5: Conditional value positively influences customers' purchase intention in live-streaming e-commerce.

### 3.6 Self-gratification value and purchase intention

Live-streaming e-commerce nowadays is not just a platform for online shopping. With the rapid development of technology and online business environment, various functions are developed and embedded in the live-streaming that have significantly enriched viewers' usage experience [129]. Purchasing a certain product is no longer the only reason consumers watch live-streaming e-commerce. It also acts as a release for consumers to escape from stress at work and an entertaining way for viewers [130]. Watching and purchasing from live-streaming e-commerce has gradually become an indispensable part of daily life. Therefore, this study introduces a new independent variable, self-gratification value, to provide a more comprehensive understanding of live-streaming viewers' perceived value. Self-gratification value is defined as the improvement in individual welfare after consuming a product or service, such as a release from pressure, diversion from a bad mood, or reduction of loneliness [92,131]. Consumers with a self-gratified attitude are reasonably more willing and spontaneous to purchase from live-streaming e-commerce. Previous studies also affirmed a positive relationship between self-gratification value and customer behaviours [62,92,131]. Therefore, this study posits:

H6: Self-gratification value positively influences customers' purchase intention in live-streaming e-commerce.

### 3.7 Moderating effect of streamer popularity

Another research objective of this study is to investigate streamer popularity's moderating effect on the relationship between consumption values and purchase intention. Although only limited studies have shed light on this specific interaction [106,132], previous literature has found that the endorsers' popularity is a relevant construct in determining consumers' attitudes and behaviours [1,106]. Kay et al. [133] suggested that influencers' social media posts with more Likes will result in consumers' higher purchase intention toward the endorsed products. Ladhari et al. [98] and Hill et al. [134] also demonstrated that consumers' purchase behaviour in endorsed products is positively related to video bloggers' popularity. In this study, streamers who enjoy high popularity and celebrity standing can easily capture millions of followers' attention and spread persuasive information during live-streaming. In this way, viewers' purchase intention developed from previous value perceptions could be fortified and stimulated by seeing their target product endorsed by a celebrity. For example, consumers' trust in a celebrity endorser could be transferred into their trust in the functional performance of the endorsed products [25]. Viewers' emotional feelings could be greatly aroused by interaction with popular celebrities and streamers [116]. Meanwhile, a popular streamer's opinion will act as a bandwagon cue, leading to the social collective choice and belief formulated within their followers [135]. As a result, the commodities endorsed by popular streams are more likely to be accepted by numerous consumers, which in turn fortifies their influence [104]. Therefore, it is reasonable to postulate that different consumption values' impact on purchase intention would be more significant for streamers with higher popularity, as proposed in H7(a, b, c, d, e, f):

H7: Streamers' popularity strengthens the influence of functional value (H7a), social value (H7b), emotional value (H7c), epistemic value (H7d), conditional value (H7e), and self-gratification value (H7f) on customers' purchase intention in live-streaming e-commerce.

## 4. Research method

### 4.1 Data collection

This study chooses users of several live-streaming e-commerce platforms as the target sample group to generate generalisable results. We specifically consider Taobao, Douyin, Kuaishou, Jindong and Pinduoduo. Among them, Taobao, Jingdong and Pinduoduo are typically known as the three leading e-commerce platforms in China, each with a vast consumer base and having successfully integrated live-streaming method into their e-commerce platforms. While Douyin and Kuaishou are two social media platforms that accumulate millions of customers by offering short video content. They have recently become two major forces in China's live-streaming e-commerce area by adding live-streaming e-commerce function to their social media application [136]. All these platforms offered similar live-streaming e-commerce shopping experiences, and viewers' purchase intention is unlikely to be cross-influenced by their shopping experience with alternative platforms [18]. Therefore, our study investigates how live-streaming e-commerce, in general, can influence viewers' purchase intention.

The research data is collected by using the survey questionnaire method. Since the initial questionnaire was designed in English, a Chinese professor who majored in English was asked to perform the back-to-back translation. Then the Chinese version was further inspected by two experts in marketing and sent to five live-streaming e-commerce users with more than two years' related shopping experience. Several changes were made to improve the language expression according to the suggestions. Before the final data collection, we assessed all the reliability and validity by conducting a pilot study among 30 respondents. The pilot study results indicate good reliability and validity of all the research variables. Finally, the survey questionnaire was generated on the Wenjuanxing website (<http://www.wjx.cn>), which has functions similar to Google Forms and is China's most popular and professional data collection website. To increase the response rate and research validity, we chose the extra sample service offered by Wenjuanxing and paid CNY 4 for each valid response. This service could help researchers to randomly deliver the questionnaire to relevant and serious respondents. To further confirm the qualification of respondents, we added a screening question of, "Have you ever watched and purchased anything from live-streaming e-commerce recently?" only those respondents who answered yes were provided permission to the rest questionnaire. The respondents were then asked to recall their recent live-streaming e-commerce purchasing experience and a familiar streamer before answering the questions. Finally, a total of 590 questionnaires were distributed through the Wenjuanxing website from April 10 to July 15, 2022. After deleting the invalid surveys based on an inconvincible time frame to complete the questionnaire and identical answers to all the items, 457 responses were recorded as valid for final data analysis. Based on the 20:1 sample-to-variable ratio suggested by Hair et al. [137], our study has eight constructs which require a sample size > 160. Therefore, a sample size of 457 is appropriate to provide a valid structural model analysis.

Table 2 illustrates the demographic information of all 457 respondents. Most respondents are female (67.83%), 42.34% of the age between 18–35. A majority of respondents (26.70%) are students, and 38.07% claimed their monthly income is less than 3,000 CNY. The demographic information also indicates that Taobao Live is the most popular live-streaming e-commerce platform with 56.46% respondents, followed by Douyin and Kuaishou, respectively, with

Table 2. Demographics information.

|                                   | Measure             | Value | Percentage |
|-----------------------------------|---------------------|-------|------------|
| Gender                            | Male                | 147   | 32.17%     |
|                                   | Female              | 310   | 67.83%     |
| Age                               | Under 18            | 3     | 0.01%      |
|                                   | 18–35               | 193   | 42.34%     |
|                                   | 35–50               | 121   | 26.53%     |
|                                   | Above 50            | 140   | 31.12%     |
| Occupation                        | Private Sector      | 93    | 20.35%     |
|                                   | Public Sector       | 82    | 17.94%     |
|                                   | Student             | 122   | 26.70%     |
|                                   | Retired             | 104   | 22.76%     |
|                                   | Self-Employment     | 56    | 12.25%     |
| Monthly Income (CNY)              | Less than 3,000     | 174   | 38.07%     |
|                                   | 3,000–5,000         | 152   | 33.26%     |
|                                   | 5,000–10,000        | 97    | 21.23%     |
|                                   | Above 10,000        | 34    | 7.44%      |
| Preferred Live Streaming Platform | Taobao              | 258   | 56.46%     |
|                                   | Douyin              | 113   | 24.73%     |
|                                   | Kuaishou            | 36    | 7.88%      |
|                                   | Jingdong, Pinduoduo | 50    | 10.94%     |

<https://doi.org/10.1371/journal.pone.0296339.t002>

24.73% and 7.88% of respondents. The sample's proportion in each live-streaming e-commerce platform is shown to be correspondent with their market share [15]. Therefore, it can be concluded that the sample has good representativeness of the whole research population.

## 4.2 Measurement scales

The final research questionnaire consists of 33 items measuring eight constructs in the proposed model. All these items were adapted from previous literature to suit the live streaming context. The functional value items are adapted from Guo et al. [1] and Wongkitrungrueng and Assarut [11]. The items of social value are adapted from Singh et al. [16] and Wongkitrungrueng and Assarut [11]. The items of emotional value are adapted from Guo et al. [1] and Singh et al. [16]. The items of epistemic value are adapted from Assarut and Eiamkanchanalai [138] and Kaur et al. [139]. The items of conditional value are adapted from Hsieh et al. [140] and Yoon et al. [127]. The items of self-gratification value are adapted from El-Adly and Eid [141]. The items of purchase intention are adapted from Chen et al. [142]. Finally, the items of streamer popularity are adapted from Ladhari et al. [98]. Appendix A presents the details of all the measurement items. We survey these items by applying a seven-point Likert scale, where 1 = “strongly disagree” and 7 = “strongly agree”. Five control variables were also adopted in the research model to ensure the findings' validity, including gender, age, occupation, income and preferred live-streaming platform.

## 4.3 Common method bias

This study adopted several remedies to mitigate common method bias according to Hulland et al.'s [143] method. First, the independent, dependent, and moderating variables are positioned arbitrarily at different places of the questionnaire to reduce sequential effects and in case a respondent perceives a causal relationship. In addition, we conducted Harman's single factor test [144] and the result shows 37.483% of the variance accounted by a single factor,

lower than the 50% criterion [145]. We further evaluated the variance inflation factor (VIF) and obtained the VIF values of all the constructs lie between 1.862–2.995. Based on Kock [146], VIF value lower than 3.3 demonstrates that collinearity is not a major concern in the research model.

## 5. Results

This study uses structural equation modelling (SEM) to assess the research model. The partial least square SEM (PLS-SEM) approach is adopted rather than covariance-based SEM (CB-SEM), because this is an exploratory study that aims at extending an existing structural theory and predicting several key target constructs [147]. We further applied SPSS 26 and SmartPLS 3.3.3 to conduct the measurement and structural model assessment.

### 5.1 Measurement model assessment

We applied confirmatory factor analysis (CFA) to establish the measurement model's internal consistency reliability, convergent validity, and discriminant validity [147]. To verify the reliability and validity, we tested the items loading, composite reliability (CR), Cronbach's alpha ( $\alpha$ ), and average variance extracted (AVE) of each research construct. As Table 3 shows, all the variables' Cronbach's  $\alpha$  (ranging from 0.813 to 0.927) and CR (ranging from 0.862 to 0.943) have reached the criterion of 0.7 proposed by Hair et al. [147], denoting solid internal reliability.

Next, we assess the convergent validity by applying item loading of 0.7, AVE of 0.5 as the criterion [147,148]. As illustrated in Table 3, all values of item loading (between 0.745 and 0.939) and AVE (between 0.574 and 0.824) have exceeded the target threshold, indicating adequate convergent validity.

Discriminant validity is assessed by comparing the square root of the AVE with the shared correlations between each pair of variables [149]. Table 4 shows that all diagonal values (lower left) are higher than the inter-construct correlations and thereby confirm the discriminant validity. The Heterotrait-Monotrait (HTMT) ratio is another approach to determining the discriminant validity. It is the ratio of the between-trait correlation to the within-trait correlation [150]. Table 4 shows that all variables' HTMT ratios (upper right) were under the criterion of 0.85 [150], indicating adequate discriminant validity.

### 5.2 Structural model assessment

We then analyze the structural model to test the relationships among constructs. We first assessed the determinant coefficient  $R^2$  to evaluate the explanatory strength. Chinn [148] stated that in social science and business research,  $R^2$  of 0.190, 0.333, and 0.670 indicate a low, moderate and large explanatory strength. The test result shows that the  $R^2$  value of purchase intention is 0.692, implying the high prediction power of the research model. Next, we adopted the blindfolding technique and tested the Stone-Geisser  $Q^2$  to check the predictive relevance. The  $Q^2$  value of purchase intention is 0.525, indicating good prediction accuracy of the research model [151]. Furthermore, we also assessed the effect size ( $f^2$ ) based on the criterion provided by Cohen [152], that 0.35, 0.15, and 0.02 represent a large, moderate, and small effect. Table 5 presents the test outcomes of determinant coefficient ( $R^2$ ), predictive relevance( $Q^2$ ) and effect size ( $f^2$ ).

We then calculate the path coefficient and T-values by using a bootstrapping subsampling technique (5,000 times) to test the research hypotheses. Tables 6 and 7, and Fig 2 present the output of SEM analysis. Regarding the direct relationships between consumption values and purchase intention, five of six hypotheses were supported by the result (Table 7). In specific,



Table 3. Reliability and validity.

| Variables                | No.  | Loadings | ( $\alpha$ ) | CR    | AVE   |
|--------------------------|------|----------|--------------|-------|-------|
| Functional Value         | FV1  | .800     | 0.826        | 0.879 | 0.594 |
|                          | FV2  | .796     |              |       |       |
|                          | FV3  | .774     |              |       |       |
|                          | FV4  | .862     |              |       |       |
|                          | FV5  | .840     |              |       |       |
| Social Value             | SV1  | .757     | 0.813        | 0.862 | 0.574 |
|                          | SV2  | .745     |              |       |       |
|                          | SV3  | .805     |              |       |       |
|                          | SV4  | .838     |              |       |       |
|                          | SV5  | .786     |              |       |       |
| Emotional Value          | EMV1 | .866     | 0.882        | 0.901 | 0.719 |
|                          | EMV2 | .842     |              |       |       |
|                          | EMV3 | .884     |              |       |       |
|                          | EMV4 | .845     |              |       |       |
| Epistemic Value          | EPV1 | .841     | 0.871        | 0.900 | 0.701 |
|                          | EPV2 | .912     |              |       |       |
|                          | EPV3 | .888     |              |       |       |
|                          | EPV4 | .794     |              |       |       |
| Conditional Value        | CV1  | .846     | 0.861        | 0.889 | 0.641 |
|                          | CV2  | .832     |              |       |       |
|                          | CV3  | .799     |              |       |       |
|                          | CV4  | .758     |              |       |       |
|                          | CV5  | .806     |              |       |       |
| Self-Gratification Value | SGV1 | .918     | 0.918        | 0.935 | 0.802 |
|                          | SGV2 | .939     |              |       |       |
|                          | SGV3 | .923     |              |       |       |
|                          | SGV4 | .891     |              |       |       |
| Purchase Intention       | PI1  | .886     | 0.859        | 0.904 | 0.779 |
|                          | PI2  | .904     |              |       |       |
|                          | PI3  | .858     |              |       |       |
| Streamer Popularity      | SP1  | .892     | 0.927        | 0.943 | 0.824 |
|                          | SP2  | .918     |              |       |       |
|                          | SP3  | .931     |              |       |       |
|                          | SP4  | .899     |              |       |       |

<https://doi.org/10.1371/journal.pone.0296339.t003>

five of the consumption values are significant determinants of purchase intention, including functional ( $\beta = 0.226$ ,  $t = 5.482$ ,  $p = 0.000$ ), social ( $\beta = 0.117$ ,  $t = 2.210$ ,  $p = 0.014$ ), emotional ( $\beta = 0.145$ ,  $t = 5.482$ ,  $p = 0.000$ ), conditional ( $\beta = 0.174$ ,  $t = 4.410$ ,  $p = 0.000$ ) and self-gratification value ( $\beta = 0.162$ ,  $t = 3.330$ ,  $p = 0.000$ ), supporting H1, H2, H3, H5 and H6. Meanwhile, epistemic value ( $\beta = 0.022$ ,  $t = 0.544$ ,  $p = 0.383$ ) is not a significant driver of satisfaction, H4 is not supported.

In this study, we also examined the moderating effect of streamer popularity on the relationships between different consumption values and purchase intention. Table 7 and Fig 2 summarize the output of SEM analysis with bootstrapping technique. The result demonstrated that streamer popularity has strengthened the relationship between functional ( $\beta = 0.136$ ,  $t = 3.185$ ,  $p = 0.000$ ), social ( $\beta = 0.225$ ,  $t = 4.167$ ,  $p = 0.000$ ), emotional ( $\beta = 0.115$ ,  $t = 2.581$ ,  $p = 0.023$ ), self-gratification ( $\beta = 0.180$ ,  $t = 4.461$ ,  $p = 0.000$ ) value and purchase intention.

**Table 4. Fornell-larcker criterion (lower left) & Heterotrait-Monotrait Ratio (HTMT).**

|                          | FV           | SV           | EMV          | EPV          | CV           | SGV          | PI           | SP           |
|--------------------------|--------------|--------------|--------------|--------------|--------------|--------------|--------------|--------------|
| Functional Value         | <b>0.771</b> | 0.394        | 0.636        | 0.403        | 0.684        | 0.557        | 0.457        | 0.392        |
| Social Value             | 0.334        | <b>0.757</b> | 0.643        | 0.631        | 0.509        | 0.590        | 0.667        | 0.566        |
| Emotional Value          | 0.572        | 0.613        | <b>0.809</b> | 0.612        | 0.639        | 0.667        | 0.727        | 0.608        |
| Epistemic Value          | 0.463        | 0.548        | 0.610        | <b>0.860</b> | 0.716        | 0.584        | 0.686        | 0.395        |
| Conditional Value        | 0.626        | 0.495        | 0.636        | 0.649        | <b>0.801</b> | 0.595        | 0.639        | 0.547        |
| Self-Gratification Value | 0.487        | 0.520        | 0.621        | 0.565        | 0.561        | <b>0.918</b> | 0.629        | 0.425        |
| Purchase Intention       | 0.520        | 0.566        | 0.554        | 0.620        | 0.597        | 0.628        | <b>0.883</b> | 0.554        |
| Streamer Popularity      | 0.355        | 0.446        | 0.478        | 0.218        | 0.407        | 0.365        | 0.466        | <b>0.929</b> |

**Note:** Bold numbers denote the square root of the AVE. The lower left values follow the Fornell–Larcker criterion, and the upper right values for the Heterotrait–monotrait criterion.

<https://doi.org/10.1371/journal.pone.0296339.t004>

However, streamer popularity does not moderate the influence of epistemic ( $\beta = -0.033$ ,  $t = 0.744$ ,  $p = 0.693$ ) and conditional value ( $\beta = -0.025$ ,  $t = 0.395$ ,  $p = 0.530$ ) on customers' purchase intention. In the meantime, we also adopted the simple slope assessment to illustrate the moderating effect. Fig 3–8 present the results of simple slope analysis in Smart-PLS. As shown in Figs 3, 4, 5 and 8, which respectively represents functional, social, emotional, and self-gratification value, the green curve (higher streamer popularity group) is steeper than the red curve (lower streamer popularity group), means that positive relationship between functional, social, emotional, self-gratification value and purchase intention is stronger when streamer popularity is high, thus supporting H7a, H7b, H7c, and H7f. On the contrary, in Figs 6 and 7, the gradient of the green line (higher streamer popularity group) has no significant difference compared to the red line (lower streamer popularity group), implying no moderating effect of streamer popularity on the relationship between epistemic value, conditional value and purchase intention, H7d and H7e are not supported.

## 6. Discussion

The current study investigates the influencing factors of live-streaming e-commerce customers' purchase intention and the moderating effect of streamer popularity. We designed a theoretical model based on the TCV and empirically examined the impact of functional, social, emotional, epistemic, conditional and self-gratification value on customers' purchase intention in live-streaming e-commerce. This study also considered the moderating effect of streamer popularity on the relationship between different consumption values and purchase intention. Our study results indicate that five of six consumption values are positively related to purchase

**Table 5. Determinant coefficient ( $R^2$ ), predictive relevance( $Q^2$ ), and effect size ( $f^2$ ).**

| Exogenous Variable       | Endogenous Variable | $R^2$ | $Q^2$ | Effect Size ( $f^2$ ) | Decision |
|--------------------------|---------------------|-------|-------|-----------------------|----------|
| Functional Value         | Purchase Intention  | 0.692 | 0.525 | 0.122                 | Small    |
| Social Value             |                     |       |       | 0.027                 | Small    |
| Emotional Value          |                     |       |       | 0.067                 | Small    |
| Epistemic Value          |                     |       |       | 0.001                 | No       |
| Conditional Value        |                     |       |       | 0.097                 | Small    |
| Self-Gratification Value |                     |       |       | 0.083                 | Small    |

<https://doi.org/10.1371/journal.pone.0296339.t005>

Table 6. Direct effect.

|    | Path   | (β)   | ST DEV. | T-Values            | Effect Size ( $f^2$ ) | Confidence Intervals |       | Decision      |
|----|--------|-------|---------|---------------------|-----------------------|----------------------|-------|---------------|
|    |        |       |         |                     |                       | Lower                | Upper |               |
| H1 | FV→PI  | 0.226 | 0.054   | 5.482**             | 0.122                 | 0.131                | 0.304 | Supported     |
| H2 | SV→PI  | 0.117 | 0.036   | 2.210*              | 0.027                 | 0.039                | 0.182 | Supported     |
| H3 | EMV→PI | 0.145 | 0.038   | 2.773**             | 0.067                 | 0.071                | 0.240 | Supported     |
| H4 | EPV→PI | 0.022 | 0.035   | 0.544 <sup>ns</sup> | 0.001                 | -0.048               | 0.115 | Not-Supported |
| H5 | CV→PI  | 0.174 | 0.049   | 4.410**             | 0.097                 | 0.110                | 0.240 | Supported     |
| H6 | SGV→PI | 0.162 | 0.038   | 3.330**             | 0.083                 | 0.087                | 0.225 | Supported     |

Note: \*  $p < 0.05$

\*\*  $p < 0.01$ , NS: Not significant.

<https://doi.org/10.1371/journal.pone.0296339.t006>

intention, and streamer popularity has strengthened the impact of four consumption values on purchase intention.

## 6.1 Consumption values and purchase intention

First, our results revealed that functional value is the primary determinant of customers' purchase intention in live-streaming e-commerce. This finding is consistent with earlier studies in the live-streaming context, such as Yu and Zheng [36] and Guo et al. [116]. Functional value in live-streaming e-commerce is related to its unique functions and advantages in the product exhibition process [9]. Functional value could be well acquired by the customers when they have a more comprehensive view of the products, or when the streamer could immediately answer their specific doubts or questions. These customers whose expectations have been fulfilled and whose doubts have been answered are reasonably more willing to buy the products.

Our findings also show that social value is a significant driver of live-streaming e-commerce users' purchase intention. This finding correlates with several previous live-streaming studies [11,36,120]. Live-streaming e-commerce is a social platform where users can share their ideas, opinions, and feedbacks during the exhibition [16]. On this platform, customers can assess the social popularity of the products among other viewers, communicate with them about their usage experience, or just talk about their shared interested topics. In this way, viewers' social identity and personality could be reinforced, further stimulating their purchasing behaviour.

Next, we found that emotional value is also an important determinant of customers' purchase intention. This echoes prior studies in similar live-streaming contexts, such as Guo et al.

Table 7. Moderating effect.

| No. | Path                              | Path Coef. (β) | ST DEV. | T-Values            | Confidence Intervals |       | Decision      |
|-----|-----------------------------------|----------------|---------|---------------------|----------------------|-------|---------------|
|     |                                   |                |         |                     | 5%                   | 95%   |               |
| H7a | Moderating Effect of SP on FV→PI  | 0.136          | 0.043   | 3.185**             | 0.079                | 0.195 | Supported     |
| H7b | Moderating Effect of SP on SV→PI  | 0.225          | 0.054   | 4.167**             | 0.131                | 0.304 | Supported     |
| H7c | Moderating Effect of SP on EMV→PI | 0.115          | 0.051   | 2.581*              | 0.027                | 0.218 | Supported     |
| H7d | Moderating Effect of SP on EPV→PI | -0.033         | 0.047   | 0.744 <sup>ns</sup> | -0.084               | 0.012 | Not-Supported |
| H7e | Moderating Effect of SP on CV→PI  | -0.025         | 0.042   | 0.395 <sup>ns</sup> | -0.135               | 0.109 | Not-Supported |
| H7f | Moderating Effect of SP on SGV→PI | 0.180          | 0.040   | 4.461**             | 0.111                | 0.256 | Supported     |

Note: \*  $p < 0.05$

\*\*  $p < 0.01$ , NS: Not significant.

<https://doi.org/10.1371/journal.pone.0296339.t007>

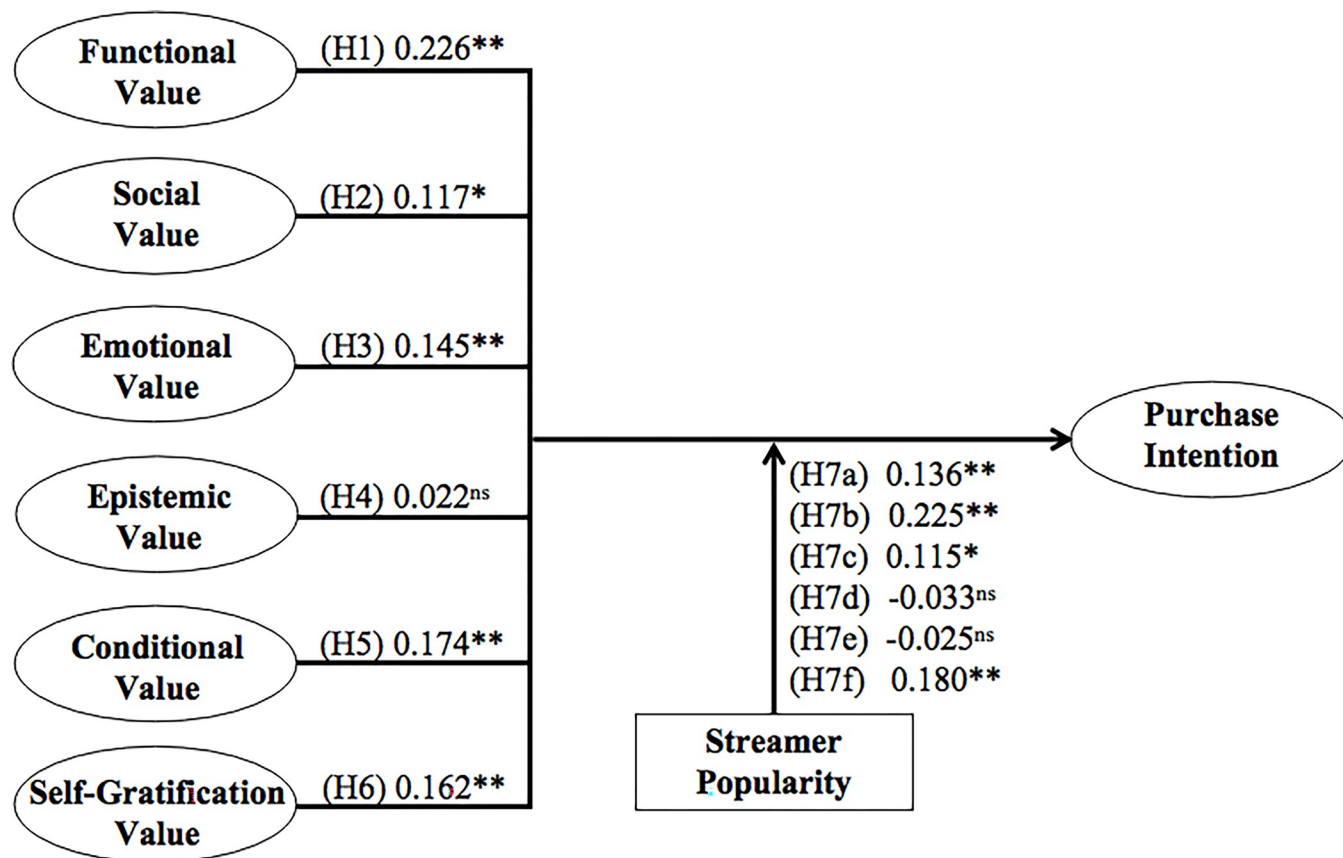

Fig 2. Structural model results. \*  $p < 0.05$ , \*\*  $p < 0.01$ , NS: not significant.

<https://doi.org/10.1371/journal.pone.0296339.g002>

[1] and Hou et al. [3]. Emotional value in live streaming e-commerce stands for its ability to stimulate viewers' positive feelings or affective states [1]. It is a significant motivational factor for users' purchase intention [153]. Viewers' emotional pleasures could be aroused by live-streaming in various ways, such as through the special gifts given by the streamer, or by participating in the online games and activities organized by the streamer. This emotional pleasure is further fortified by the streamer's distinctive features, such as humorous character or physical attractiveness. As a result, the entertainment, excitement, and fulfilment perceived by viewers have laid the foundations for their emotional states of mind and will eventually drive their purchase intention.

However, the findings demonstrated an insignificant connection between epistemic value and purchase intention. This is an unexpected result and contradicts a number of previous studies [125,154,155]. There are two possible explanations for this contradiction. Firstly, studies that concluded a positive connection between epistemic value and customers behaviour were mostly carried out in contexts that closely related to epistemic value, such as in tourism [156] or food industry [154,155]. In these context settings, seeking novelty (new tourist spot) or variety (different food tastes) is the core of customers' value expectations. However, this is not the case in live-streaming e-commerce. As an online shopping channel that has existed for some time, seeking novel experiences is no longer the primary concern of the viewers. Secondly, the essence of live-streaming e-commerce is about selling products [24]. Compared with epistemic value, viewers' purchase intention is more likely triggered by the vivid exhibition of products' physical performance (functional value) or positive peer comments (social

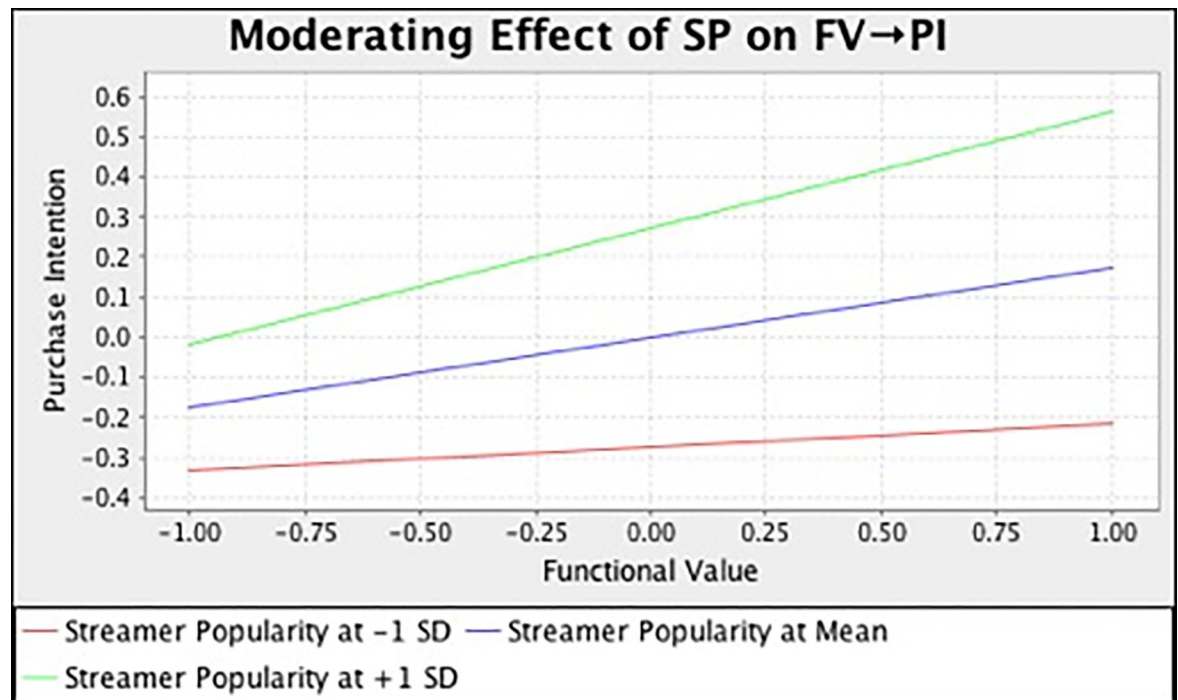

Fig 3. Moderating Effect of SP on FV → PI.

<https://doi.org/10.1371/journal.pone.0296339.g003>

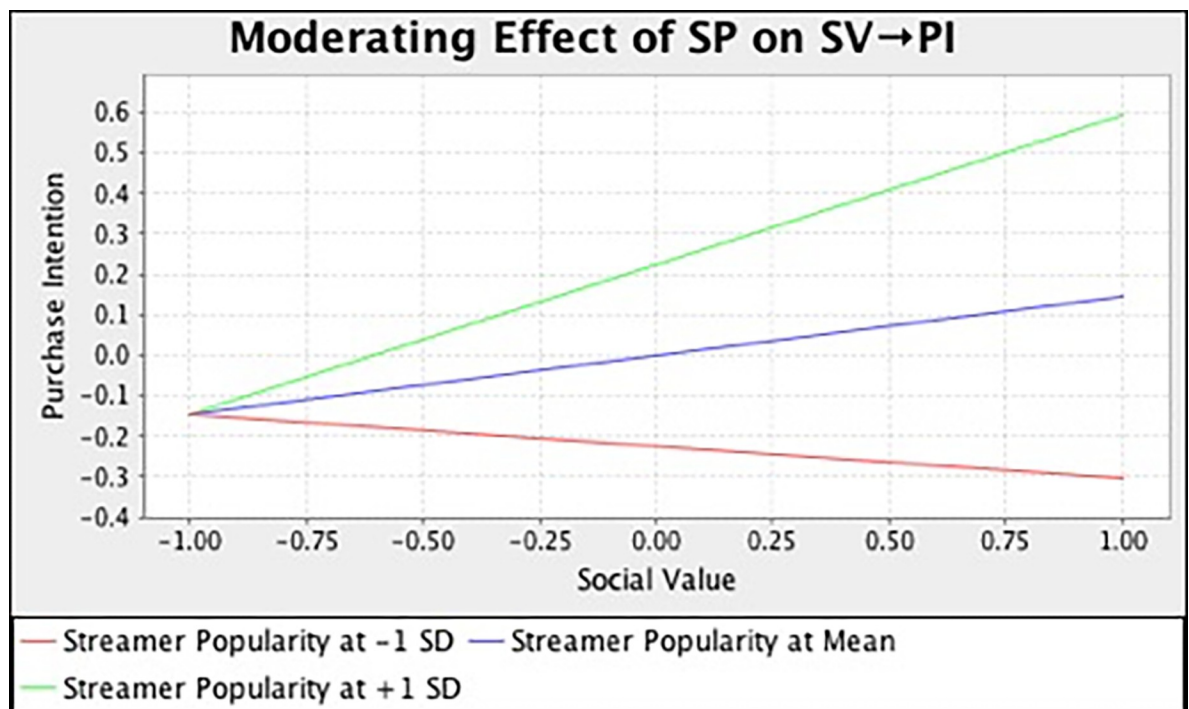

Fig 4. Moderating Effect of SP on SV → PI.

<https://doi.org/10.1371/journal.pone.0296339.g004>



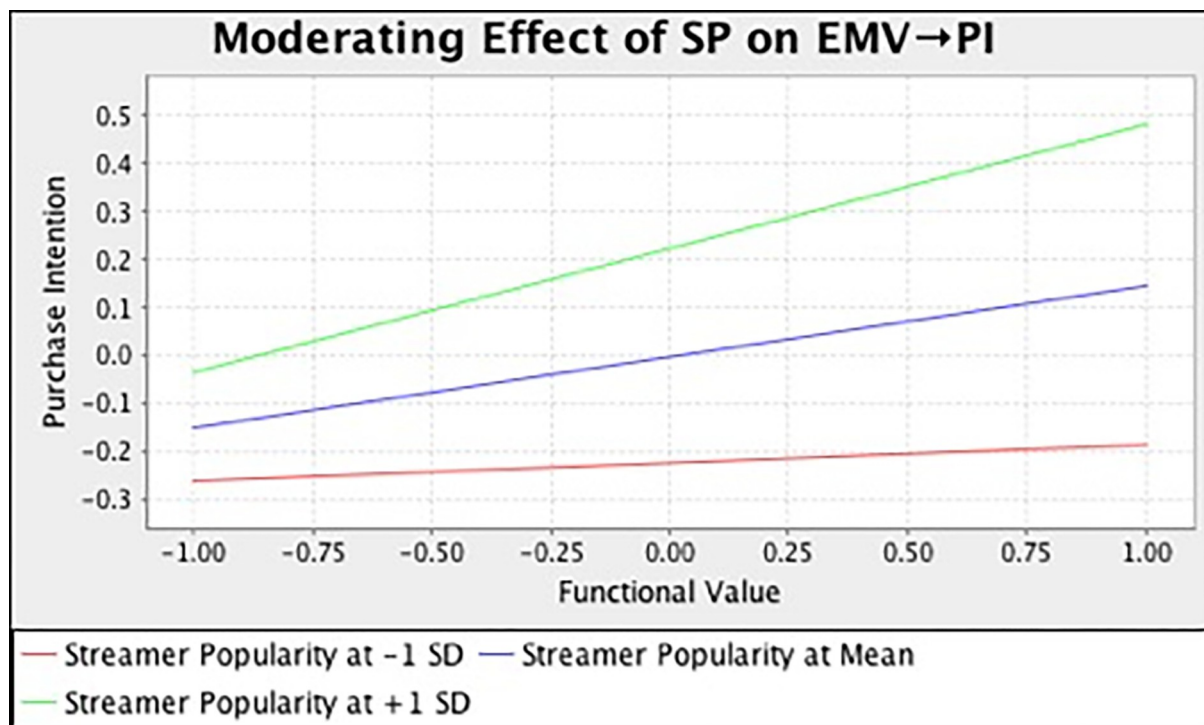

Fig 5. Moderating Effect of SP on EMV → PI.

<https://doi.org/10.1371/journal.pone.0296339.g005>

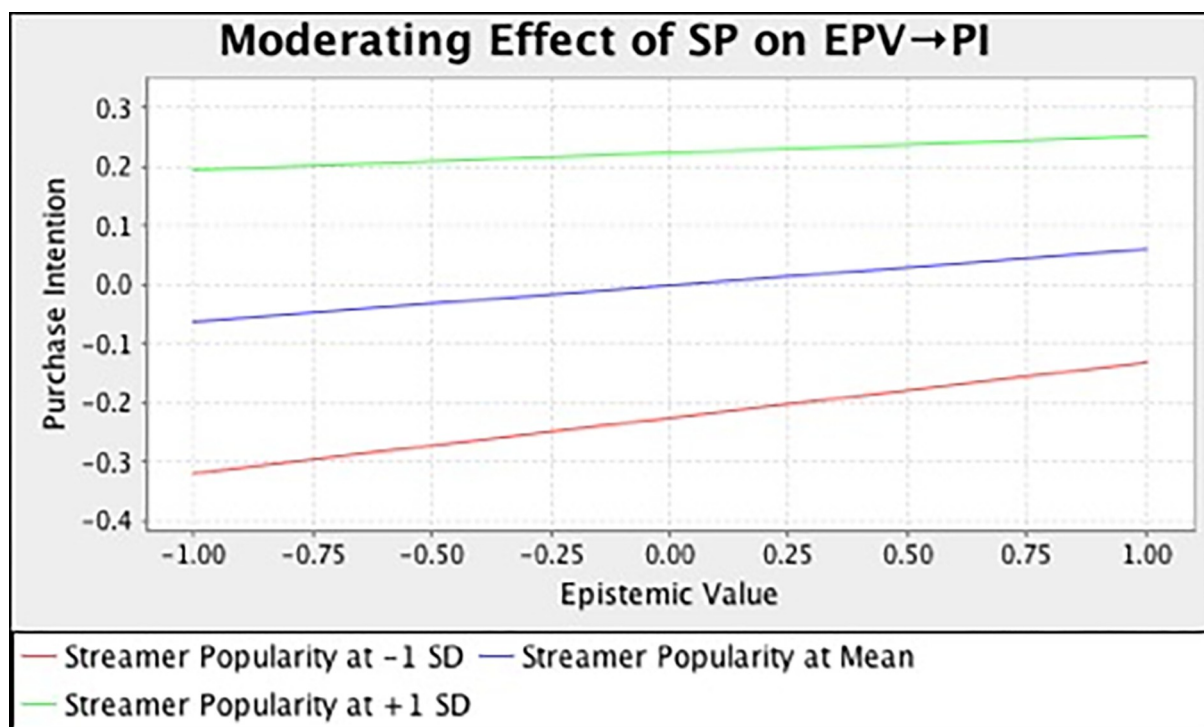

Fig 6. Moderating Effect of SP on EPV → PI.

<https://doi.org/10.1371/journal.pone.0296339.g006>



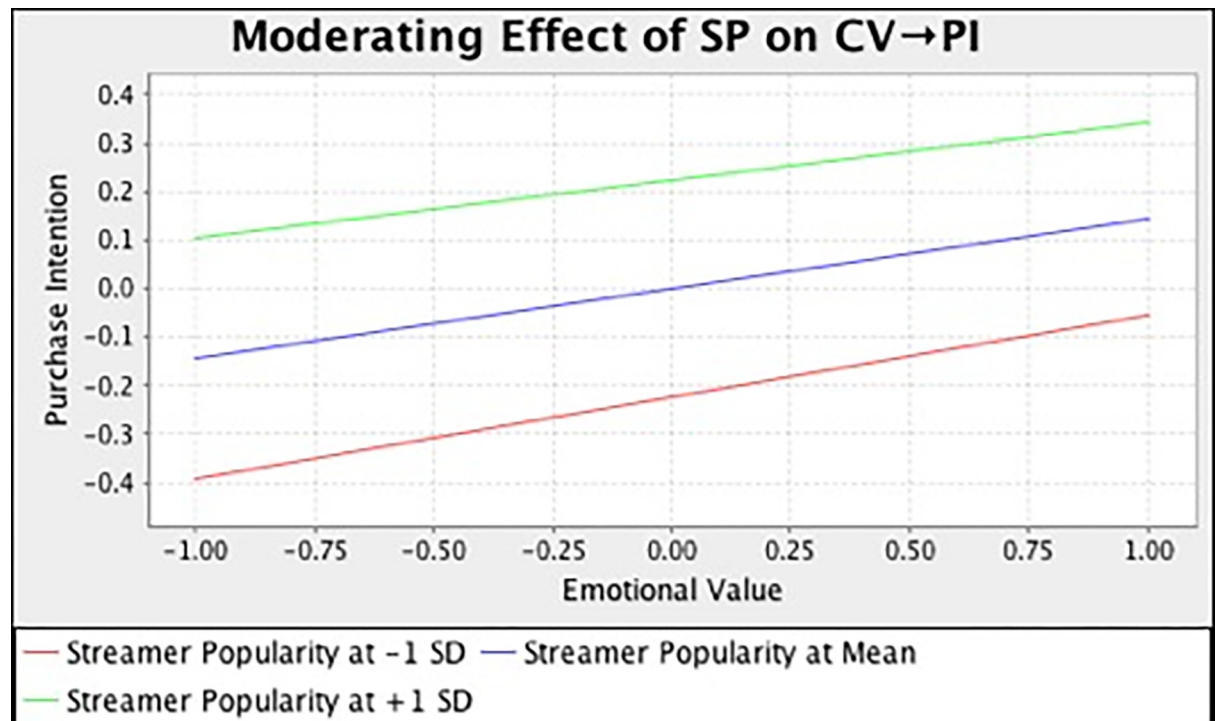

Fig 7. Moderating Effect of SP on CV → PI.

<https://doi.org/10.1371/journal.pone.0296339.g007>

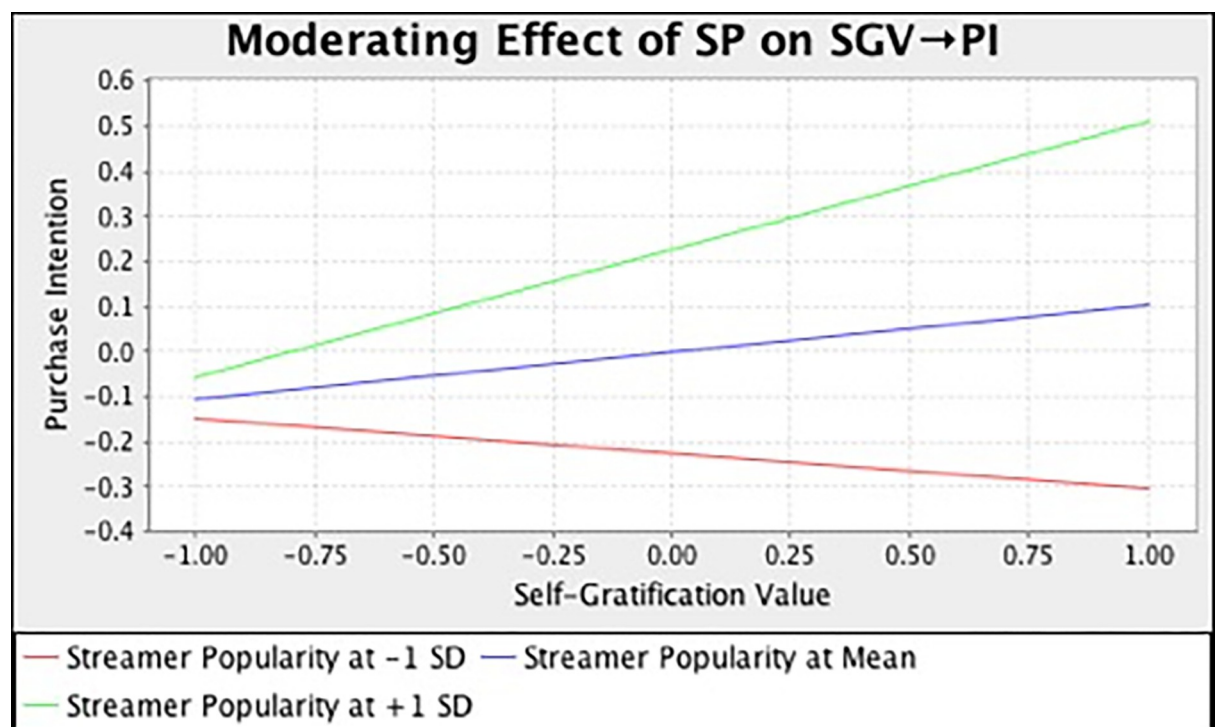

Fig 8. Moderating Effect of SP on SGV → PI.

<https://doi.org/10.1371/journal.pone.0296339.g008>

value). Therefore, this study concluded epistemic value does not influence customers' purchase intention in live-streaming e-commerce.

Conditional value is found to be a significant driver of purchase intention in live-streaming e-commerce. This finding is consistent with prior studies of Talwar et al. [81] and Chakraborty and Paul [121]. Conditional value stands for live-streaming e-commerce's ability to satisfy viewers' demands in specific circumstances [126]. It can be perceived by customers when they communicate with their favourite celebrity streamers, or when merchants offer conditional discounts only to those online viewers. As a result, viewers could buy their wanted product at an unparalleled low price and engage with their celebrity streamer during the shopping process. Moreover, during the COVID-19 pandemic, live-streaming e-commerce offers a unique conditional benefit, allowing people to shop in a virtually real environment without stepping out of the house. Subsequently, all these conditional values perceived by viewers would positively stimulate their purchase intention in live-streaming e-commerce.

Our study also demonstrated that self-gratification value is a significant determinant of purchase intention in live-streaming e-commerce. This finding is in line with several prior studies [92,131], and also provides solid justifications for extending the original TCV by incorporating self-gratification value as an extra independent variable in live-streaming e-commerce context. Self-gratification value is received by live-streaming viewers from the effectiveness of the overall watching and purchasing experience to reduce their tension and stress [62]. As a compound platform of video clips, real-time interaction, and online shopping [3,4], live-streaming e-commerce nowadays is becoming an important way for ordinary people to divert their attention from routine work and entertaining themselves [130]. When users feel self-gratified with the overall performance of live-streaming e-commerce, it is reasonable to predict they are more likely to watch and purchase in live-streaming e-commerce.

## 6.2 Moderating effect of streamer popularity

Although previous researchers have mentioned the direct influence of streamer popularity on customer behaviour, our research is among a few studies that have tested the interaction of streamer popularity with the connection between value and purchase intention. The result of the moderating effect analysis provides several interesting insights. First of all, as we expected, streamer popularity has strengthened the impact of functional, social, emotional and self-gratification value on live-streaming e-commerce viewers' purchase intention, indicating that for streamers with higher popularity, viewers' perceived functional, social, emotional and self-gratification are more likely to transit to their purchase intention. The possible explanation is that popular streamers are more likely to attract viewers' attention and disseminate positive information about their endorsed products. Their tendentious promotional propaganda would sound more convincing and attractive to viewers than less popular streamers, subsequently increasing the impact of functional value on viewers' purchase intention. Similarly, judgment from a popular streamer will influence the social collective choice and belief among viewers, the attachment to a popular streamer or the fans' community will result in a stronger influence of viewers' perceived social value on purchase intention. Next, popular streamers and celebrities could further arouse viewers' emotional states and create an atmosphere of excitement, which is the cradle for impulse buying intention. Finally, popular streamers are typically with certain advantages in their physical attractiveness or outstanding speaking skills, and their live-stream program is deliberately designed as a delicate mixture of entertaining content and e-commerce purpose. Viewers immersed in such live-streaming rooms tend to be more gratified and feel obligated to buy something.

On the contrary, our findings show that streamer popularity does not strengthen the influence of epistemic and conditional value on customers' purchase intention. We provide two

possible explanations for these unexpected findings. First, epistemic value in live-streaming e-commerce is mainly reflected by searching for novelty products or experiences. However, popular streamers tend to choose traditional products with stable quality and performance to avoid risks in after-sales and protect their reputation. As such, streamer popularity has only limited influence on epistemic value and purchase intention interaction. Secondly, conditional value is conceptually related to situational factors such as exclusive discounts or coupons offered during live streaming, and these situational factors' influence does not rely on the streamer's popularity. Viewers' purchase intention for a certain product will always be triggered by a special discount offered, regardless of whether the discounts or coupons are given by a popular streamer or not.

### 6.3 Theoretical implications

This study has three main theoretical contributions. First, our research is among limited studies that examine live-streaming e-commerce customers' behaviour from a value perspective. This study provides a validated comprehensive multi-dimensional value framework in live-streaming e-commerce context. The study findings demonstrated that five of six consumption values are significant determinants of customers' purchase intention in live-streaming e-commerce. Secondly, we expand the original Theory of Consumption Values by introducing self-gratification value as a new contextual independent variable. The empirical results suggest that self-gratification value is a significant driver of customers' purchase intention in live-streaming e-commerce. Thus, this study has expanded the usage of TCV and strengthened its explaining power. It also demonstrates that TCV can be further developed and adapted to various research contexts to better understand consumer behaviour. Thirdly, this study incorporates a moderating variable streamer popularity into the research framework and tests its moderating effect on the relationship between consumption values and purchase intention. The empirical study results show that streamer popularity has strengthened the impact of four consumption values on purchase intention. As such, this study provides useful insights into the celebrity streamers' moderating mechanism underlying the link between different consumption values and purchase intention.

### 6.4 Practical implications

Our findings also have several practical contributions for live-streaming e-commerce merchants and operators. First, this study offers insights into purchase intention in live-streaming e-commerce from a customer's value perspective. Merchants and operators can use these findings to strengthen customers' value perceptions and stimulate their purchase intention. They should prioritize company resources and optimize marketing strategies to provide services that could deliver functional, social, emotional, conditional, and self-gratification value. For example, merchants could make the product exhibition process more informative and attractive to increase functional value. They can also intentionally guide viewers to participate in online discussions to cultivate their social value, or provide more exciting online games and entertaining content to stimulate customers' emotional and self-gratification value.

In addition, merchants and operators need to understand that customers' purchase intention will not be driven by epistemic value. They should realize that although live-streaming e-commerce has been widely discussed as an emerging technological trend that provides a novel shopping experience and creates massive customer engagement [6,11], the fact is that viewers will not buy from live-streaming only because their curiosity and variety-seeking intentions have been fulfilled. Therefore, merchants should avoid putting too much effort into epistemic value initiatives.

Furthermore, merchants need to be aware of the moderating role of streamer popularity and wield it cautiously. For online stores or products that have a tight connection with functional, social, emotional, and self-gratification value, such as home appliances (functional), wine (social), games (emotional) or music (self-gratification), merchants could increase their sales by inviting famous celebrities or streamers to host their live-stream shows. On the contrary, for those online stores or products closely related to epistemic (tourism agency) and conditional value (outlets), investing extra money in popular streamers is not recommended.

## 7. Limitations and future research

Although this study has several sound theoretical and practical contributions, we acknowledge several limitations. First of all, we collect data from users of several Chinese live-streaming platforms. Future studies can be performed in different countries and cultural backgrounds to increase the generalizability of the findings. Second, although we include several control variables in our paper to give a general finding, we hadn't considered different product types that may influence purchase intention. It is recommended for future studies to explore the impact of other product-related elements on live-streaming purchase intention. Third, our study examines purchase intention from a consumer's angle, while platforms and merchants are also indispensable parts of live-streaming e-commerce [11]. Future research can try to explain consumer behaviour by incorporating diversified perspectives. Lastly, this is a cross-sectional study that only could explain customer behaviour at a specific point in time. Future studies may use longitudinal research to explore possible changes in live-streaming e-commerce users' purchase intention.

## Supporting information

**S1 Data. Original empirical study data.**  
(XLSX)

**S1 Appendix. A constructs, measurement items and sources.**  
(DOCX)

## Author Contributions

**Conceptualization:** Qi Zhang, Shaizatulaqma Kamalul Ariffin.

**Data curation:** Qi Zhang, Yuling Wang.

**Formal analysis:** Qi Zhang, Yuling Wang.

**Funding acquisition:** Yuling Wang.

**Methodology:** Qi Zhang, Yuling Wang.

**Supervision:** Qi Zhang.

**Writing – original draft:** Qi Zhang, Yuling Wang.

**Writing – review & editing:** Yuling Wang, Shaizatulaqma Kamalul Ariffin.

## References

1. Guo Y., Zhang K., and Wang C., "Way to success: Understanding top streamer's popularity and influence from the perspective of source characteristics," *J. Retail. Consum. Serv.*, vol. 64, 2022, <https://doi.org/10.1016/j.jretconser.2021.102786>

2. Zhang S., Huang C., Li X., and Ren A., "Characteristics and roles of streamers in e-commerce live streaming," *Serv. Ind. J.*, 2022, <https://doi.org/10.1080/02642069.2022.2068530>
3. Hou F., Guan Z., Li B., and Chong A. Y. L., "Factors influencing people's continuous watching intention and consumption intention in live streaming: Evidence from China," *Internet Res.*, vol. 30, no. 1, pp. 141–163, 2020, <https://doi.org/10.1108/INTR-04-2018-0177>
4. Li B., Hou F., Guan Z., and Chong A. Y. L., "What drives people to purchase virtual gifts in live streaming? The mediating role of flow," *Proc. 22nd Pacific Asia Conf. Inf. Syst.—Oppor. Challenges Digit. Soc. Are We Ready?*, PACIS 2018, 2018.
5. Chen J. and Liao J., "Antecedents of Viewers' Live Streaming Watching: A Perspective of Social Presence Theory," *Front. Psychol.*, vol. 13, 2022, <https://doi.org/10.3389/fpsyg.2022.839629> PMID: 35432106
6. Hu M. and Chaudhry S. S., "Enhancing consumer engagement in e-commerce live streaming via relational bonds," *Internet Res.*, vol. 30, no. 3, pp. 1019–1041, 2020, <https://doi.org/10.1108/INTR-03-2019-0082>
7. Liao J., Chen K., Qi J., Li J., and Yu I. Y., "Creating immersive and parasocial live shopping experience for viewers: the role of streamers' interactional communication style," *J. Res. Interact. Mark.*, vol. 17, no. 1, pp. 140–155, 2023, <https://doi.org/10.1108/JRIM-04-2021-0114>
8. Sun Y., Shao X., Li X., Guo Y., and Nie K., "A 2020 perspective on 'How live streaming influences purchase intentions in social commerce: An IT affordance perspective,'" *Electron. Commer. Res. Appl.*, vol. 40, 2020, <https://doi.org/10.1016/j.elerap.2020.100958>
9. Ming J., Jianqiu Z., Bilal M., Akram U., and Fan M., "How social presence influences impulse buying behavior in live streaming commerce? The role of S-O-R theory," *Int. J. Web Inf. Syst.*, vol. 17, no. 4, pp. 300–320, 2021, <https://doi.org/10.1108/IJWIS-02-2021-0012>
10. Qiu L., Chen X., and Lee T. J., "How can the celebrity endorsement effect help consumer engagement? A case of promoting tourism products through live streaming," *Sustain.*, vol. 13, no. 15, 2021, <https://doi.org/10.3390/su13158655>
11. Wongkitrungrueng A. and Assarut N., "The role of live streaming in building consumer trust and engagement with social commerce sellers," *J. Bus. Res.*, vol. 117, pp. 543–556, 2020, <https://doi.org/10.1016/j.jbusres.2018.08.032>
12. Qianzhan Industrial Research Institute, "Report of Commercial Model Innovation and Investment Opportunities Analysis on China Webcast Industry (2021–2026)," 2020. [Online]. Available: <https://bg.qianzhan.com/report/detail/1703101733143305.html>.
13. iiMedia Research, "2020 China Live Streaming Industry Operating Status Report," 2021.
14. SFOC, "2020 Live Streaming E-commerce Industry Report—Top 100 Streamer," 2021.
15. iiMedia Research, "Development status and market research analysis report of China's live broadcasting industry," 2023. [Online]. Available: <https://report.iimedia.cn/repo13-0/43128.html?acPlatCode=bj&acFrom=bj43128>.
16. Singh S., Singh N., Kalinić Z., and Liébana-Cabanillas F. J., "Assessing determinants influencing continued use of live streaming services: An extended perceived value theory of streaming addiction," *Expert Syst. Appl.*, vol. 168, 2021, <https://doi.org/10.1016/j.eswa.2020.114241>
17. Chen Y. H., Chen M. C., and Keng C. J., "Measuring online live streaming of perceived servicescape: Scale development and validation on behavior outcome," *Internet Res.*, vol. 30, no. 3, pp. 737–762, 2020, <https://doi.org/10.1108/INTR-11-2018-0487>
18. Sun Y., Shao X., Li X., Guo Y., and Nie K., "How live streaming influences purchase intentions in social commerce: An IT affordance perspective," *Electron. Commer. Res. Appl.*, vol. 37, 2019, <https://doi.org/10.1016/j.elerap.2019.100886>
19. Ma Y., "Elucidating determinants of customer satisfaction with live-stream shopping: An extension of the information systems success model," *Telemat. Informatics*, vol. 65, 2021, <https://doi.org/10.1016/j.tele.2021.101707>
20. Xue J., Liang X., Xie T., and Wang H., "See now, act now: How to interact with customers to enhance social commerce engagement?," *Inf. Manag.*, vol. 57, no. 6, 2020, <https://doi.org/10.1016/j.im.2020.103324>
21. Clement Addo P., Fang J., Asare A. O., and Kulbo N. B., "Customer engagement and purchase intention in live-streaming digital marketing platforms: 实时流媒体数字营销平台中的客户参与和购买意向," *Serv. Ind. J.*, vol. 41, no. 11–12, pp. 767–786, 2021, <https://doi.org/10.1080/02642069.2021.1905798>
22. Zhang M., Qin F., Wang G. A., and Luo C., "The impact of live video streaming on online purchase intention," *Serv. Ind. J.*, vol. 40, no. 9–10, pp. 656–681, 2020, <https://doi.org/10.1080/02642069.2019.1576642>



23. Xie C., Yu J., (Sam) Huang S., and Zhang J., "Tourism e-commerce live streaming: Identifying and testing a value-based marketing framework from the live streamer perspective," *Tour. Manag.*, vol. 91, 2022, <https://doi.org/10.1016/j.tourman.2022.104513>
24. Geng R., Wang S., Chen X., Song D., and Yu J., "Content marketing in e-commerce platforms in the internet celebrity economy," *Ind. Manag. Data Syst.*, vol. 120, no. 3, pp. 464–485, 2020, <https://doi.org/10.1108/IMDS-05-2019-0270>
25. Yang W., "Star power: the evolution of celebrity endorsement research," *Int. J. Contemp. Hosp. Manag.*, vol. 30, no. 1, pp. 389–415, 2018, <https://doi.org/10.1108/IJCHM-09-2016-0543>
26. Erdogan B. Z., "Celebrity Endorsement: A Literature Review," *J. Mark. Manag.*, vol. 15, no. 4, pp. 291–314, 1999, <https://doi.org/10.1362/026725799784870379>
27. Li M., Wang Q., and Cao Y., "Understanding Consumer Online Impulse Buying in Live Streaming E-Commerce: A Stimulus-Organism-Response Framework," *Int. J. Environ. Res. Public Health*, vol. 19, no. 7, 2022, <https://doi.org/10.3390/ijerph19074378> PMID: 35410059
28. Xu X., Wu J. H., and Li Q., "What drives consumer shopping behavior in live streaming commerce?," *J. Electron. Commer. Res.*, vol. 21, no. 3, pp. 144–167, 2020.
29. Zheng S., Wu M., and Liao J., "The impact of destination live streaming on viewers' travel intention," *Curr. Issues Tour.*, vol. 26, no. 2, pp. 184–198, 2023, <https://doi.org/10.1080/13683500.2022.2117594>
30. Haimson O. L. and Tang J. C., "What makes live events engaging on Facebook Live, Periscope, and Snapchat," *Conf. Hum. Factors Comput. Syst.—Proc.*, vol. 2017-May, pp. 48–60, 2017, <https://doi.org/10.1145/3025453.3025642>
31. Cai J. and Wohn D. Y., "Live streaming commerce: Uses and gratifications approach to understanding Consumers' motivations," *Proc. Annu. Hawaii Int. Conf. Syst. Sci.*, vol. 2019-Janua, pp. 2548–2557, 2019, <https://doi.org/10.24251/hicss.2019.307>
32. Recktenwald D., "Toward a transcription and analysis of live streaming on Twitch," *J. Pragmat.*, vol. 115, pp. 68–81, 2017, <https://doi.org/10.1016/j.pragma.2017.01.013>
33. Guan Z., Hou F., Li B., Chong A. Y. L., and Phang C. W., "What encourages purchase of virtual gifts in live streaming: Cognitive absorption, social experience and technological environment," *40th Int. Conf. Inf. Syst. ICIS 2019*, 2019.
34. Chen C. C. and Lin Y. C., "What drives live-stream usage intention? The perspectives of flow, entertainment, social interaction, and endorsement," *Telemat. Informatics*, vol. 35, no. 1, pp. 293–303, 2018, <https://doi.org/10.1016/j.tele.2017.12.003>
35. Sjöblom M. and Hamari J., "Why do people watch others play video games? An empirical study on the motivations of Twitch users," *Comput. Human Behav.*, vol. 75, pp. 985–996, 2017, <https://doi.org/10.1016/j.chb.2016.10.019>
36. Yu F. and Zheng R., "The effects of perceived luxury value on customer engagement and purchase intention in live streaming shopping," *Asia Pacific J. Mark. Logist.*, 2021, <https://doi.org/10.1108/APJML-08-2021-0564>
37. Yu E., Jung C., Kim H., and Jung J., "Impact of viewer engagement on gift-giving in live video streaming," *Telemat. Inform.*, vol. 35, no. 5, pp. 1450–1460, 2018.
38. Park H. J. and Lin L. M., "The effects of match-ups on the consumer attitudes toward internet celebrities and their live streaming contents in the context of product endorsement," *J. Retail. Consum. Serv.*, vol. 52, 2020, <https://doi.org/10.1016/j.jretconser.2019.101934>
39. Quan Y., Choe J. S., and Im I., "The economics of para-social interactions during live streaming broadcasts: A study of wanghongs," *Asia Pacific J. Inf. Syst.*, vol. 30, no. 1, pp. 143–165, 2020, <https://doi.org/10.14329/apjis.2020.30.1.143>
40. Ma Y., "To shop or not: Understanding Chinese consumers' live-stream shopping intentions from the perspectives of uses and gratifications, perceived network size, perceptions of digital celebrities, and shopping orientations," *Telemat. Informatics*, vol. 59, 2021, <https://doi.org/10.1016/j.tele.2021.101562>
41. Li Y. and Peng Y., "What Drives Gift-giving Intention in Live Streaming? The Perspectives of Emotional Attachment and Flow Experience," *Int. J. Hum. Comput. Interact.*, vol. 37, no. 14, pp. 1317–1329, 2021, <https://doi.org/10.1080/10447318.2021.1885224>
42. (Monroe) Meng L., Duan S., Zhao Y., Lü K., and Chen S., "The impact of online celebrity in livestreaming E-commerce on purchase intention from the perspective of emotional contagion," *J. Retail. Consum. Serv.*, vol. 63, 2021, <https://doi.org/10.1016/j.jretconser.2021.102733>
43. Kang K., Lu J., Guo L., and Li W., "The dynamic effect of interactivity on customer engagement behavior through tie strength: Evidence from live streaming commerce platforms," *Int. J. Inf. Manage.*, vol. 56, 2021, <https://doi.org/10.1016/j.ijinfomgt.2020.102251>



44. Li Y., Li X., and Cai J., "How attachment affects user stickiness on live streaming platforms: A socio-technical approach perspective," *J. Retail. Consum. Serv.*, vol. 60, 2021, <https://doi.org/10.1016/j.jretconser.2021.102478>
45. Lu B. and Chen Z., "Live streaming commerce and consumers' purchase intention: An uncertainty reduction perspective," *Inf. Manag.*, vol. 58, no. 7, 2021, <https://doi.org/10.1016/j.im.2021.103509>
46. Xu P., Cui B. J., and Lyu B., "Influence of Streamer's Social Capital on Purchase Intention in Live Streaming E-Commerce," *Front. Psychol.*, vol. 12, 2022, <https://doi.org/10.3389/fpsyg.2021.748172> PMID: 35140648
47. Zhang M., Liu Y., Wang Y., and Zhao L., "How to retain customers: Understanding the role of trust in live streaming commerce with a socio-technical perspective," *Comput. Human Behav.*, vol. 127, 2022, <https://doi.org/10.1016/j.chb.2021.107052>
48. Liu X., Zeng Y., Li Z., and Huang D., "Understanding consumers' motivations to view travel live streaming: Scale development and validation," *Tour. Manag. Perspect.*, vol. 44, 2022, <https://doi.org/10.1016/j.tmp.2022.101027>
49. Zheng S., Chen J., Liao J., and Hu H. L., "What motivates users' viewing and purchasing behavior motivations in live streaming: A stream-streamer-viewer perspective," *J. Retail. Consum. Serv.*, vol. 72, 2023, <https://doi.org/10.1016/j.jretconser.2022.103240>
50. Jin S. V. and Youn S., "They bought it, therefore I will buy it: The effects of peer users' conversion as sales performance and entrepreneurial sellers' number of followers as relationship performance in mobile social commerce," *Comput. Human Behav.*, vol. 131, 2022, <https://doi.org/10.1016/j.chb.2022.107212>
51. Chen Z., Benbasat I., and Cenfetelli R., "Grassroots Internet Celebrity Live Streaming Activating IT-Mediated Lifestyle Marketing Services at e-Commerce Websites," *ICIS 2017 Transform. Soc. with Digit. Innov.*, 2018.
52. Hyun Jung P. and Li Min L., "The effects of match-ups on the consumer attitudes toward internet celebrities and their live streaming contents in the context of product endorsement," *J. Retail. Consum. Serv.*, vol. 52, 2020.
53. Chen S. C. and Lin C. P., "Understanding the effect of social media marketing activities: The mediation of social identification, perceived value, and satisfaction," *Technol. Forecast. Soc. Change*, vol. 140, pp. 22–32, 2019, <https://doi.org/10.1016/j.techfore.2018.11.025>
54. Foroudi P., Yu Q., Gupta S., and Foroudi M. M., "Enhancing university brand image and reputation through customer value co-creation behaviour," *Technol. Forecast. Soc. Change*, vol. 138, pp. 218–227, 2019, <https://doi.org/10.1016/j.techfore.2018.09.006>
55. Dodds W. B. and Monroe K. B., "The effect of brand and price information on subjective product evaluations," *Adv. Consum. Res.*, 1985.
56. Zeithaml V. A., "Consumer Perceptions of Price, Quality, and Value: A Means-End Model and Synthesis of Evidence," *J. Mark.*, vol. 52, no. 3, p. 2, 1988, <https://doi.org/10.2307/1251446>
57. Chrysoschoidis G. M. and Krystallis A., "Organic consumers' personal values research: Testing and validating the list of values (LOV) scale and implementing a value-based segmentation task," *Food Qual. Prefer.*, vol. 16, no. 7, pp. 585–599, 2005, <https://doi.org/10.1016/j.foodqual.2005.01.003>
58. Kamakura W. A. and Novak T. P., "Value-System Segmentation: Exploring the Meaning of LOV," *J. Consum. Res.*, vol. 19, no. 1, p. 119, 1992, <https://doi.org/10.1086/209291>
59. Vinson D. E., Scott J. E., and Lamont L. M., "The Role of Personal Values in Marketing and Consumer Behavior," *J. Mark.*, vol. 41, no. 2, p. 44, 1977, <https://doi.org/10.2307/1250633>
60. Legohérel P., Dauce B., Hsu C. H. C., and Ranchhold A., "Culture, time orientation, and exploratory buying behavior," *J. Int. Consum. Mark.*, vol. 21, no. 2, pp. 93–107, 2009, <https://doi.org/10.1080/08961530802153029>
61. Kainth J. S. and V Verma H., "Consumer Perceived Value: Construct Apprehension and its Evolution Consumer Perceived Value: Construct Apprehension and its Evolution," *J. Adv. Soc. Res.*, vol. 1, no. January 2011, pp. 20–57, 2011.
62. Omigie N. O., Zo H., Rho J. J., and Ciganek A. P., "Customer pre-Adoption choice behavior for M-PESA mobile financial services: Extending the theory of consumption values," *Ind. Manag. Data Syst.*, vol. 117, no. 5, pp. 910–926, 2017, <https://doi.org/10.1108/IMDS-06-2016-0228>
63. Tuncer I., Unusan C., and Cobanoglu C., "Service Quality, Perceived Value and Customer Satisfaction on Behavioral Intention in Restaurants: An Integrated Structural Model," *J. Qual. Assur. Hosp. Tour.*, vol. 22, no. 4, pp. 447–475, 2021, <https://doi.org/10.1080/1528008X.2020.1802390>
64. Karjaluoto H., Shaikh A. A., Saarijärvi H., and Saraniemi S., "How perceived value drives the use of mobile financial services apps," *Int. J. Inf. Manage.*, vol. 47, pp. 252–261, 2019, <https://doi.org/10.1016/j.ijinfomgt.2018.08.014>

65. de M E. A. Watanabe S. Alfinito I. C. G. Curvelo, and Hamza K. M., "Perceived value, trust and purchase intention of organic food: a study with Brazilian consumers," *Br. Food J.*, vol. 122, no. 4, pp. 1070–1184, 2020, <https://doi.org/10.1108/BFJ-05-2019-0363>
66. Charton-Vachet F., Lombart C., and Louis D., "Impact of attitude towards a region on purchase intention of regional products: the mediating effects of perceived value and preference," *Int. J. Retail Distrib. Manag.*, vol. 48, no. 7, pp. 707–725, 2020, <https://doi.org/10.1108/IJRD-09-2019-0315>
67. Yu J., Lee H., Ha I., and Zo H., "User acceptance of media tablets: An empirical examination of perceived value," *Telemat. Informatics*, vol. 34, no. 4, pp. 206–223, 2017, <https://doi.org/10.1016/j.tele.2015.11.004>
68. Farah M. F., Hasni M. J. S., and Abbas A. K., "Mobile-banking adoption: empirical evidence from the banking sector in Pakistan," *Int. J. Bank Mark.*, vol. 36, no. 7, pp. 1386–1413, 2018, <https://doi.org/10.1108/IJBM-10-2017-0215>
69. Li Y. and Shang H., "Service quality, perceived value, and citizens' continuous-use intention regarding e-government: Empirical evidence from China," *Inf. Manag.*, vol. 57, no. 3, 2020, <https://doi.org/10.1016/j.im.2019.103197>
70. Sthapit E., Del Chiappa G., Coudounaris D. N., and Bjork P., "Determinants of the continuance intention of Airbnb users: consumption values, co-creation, information overload and satisfaction," *Tour. Rev.*, vol. 75, no. 3, pp. 511–531, 2019, <https://doi.org/10.1108/TR-03-2019-0111>
71. Ahn J. and Kwon J., "Green hotel brands in Malaysia: perceived value, cost, anticipated emotion, and revisit intention," *Curr. Issues Tour.*, vol. 23, no. 12, pp. 1559–1574, 2020, <https://doi.org/10.1080/13683500.2019.1646715>
72. Sevilmiş A. and Çevik H., "Perceived Value: Definitions, Concepts and Measures for Sport and Fitness Industry," vol. 23, no. 2, pp. 119–129, 2021.
73. Ofori K. S., Anyigba H., Adeola O., Junwu C., Osakwe C. N., and David-West O., "Understanding post-adoption behaviour in the context of ride-hailing apps: the role of customer perceived value," *Inf. Technol. People*, 2021, <https://doi.org/10.1108/ITP-06-2019-0285>
74. Ho J. M., Sia J. K. M., Lee S., and Yap C. S., "What are Convention Attendees Looking for? An Examination of the Impact of Perceived Value and Value Co-creation on Attitude Formation," *Event Manag.*, 2021, <https://doi.org/10.3727/152599521x16288665119396>
75. Sweeney J. C. and Soutar G. N., "Consumer perceived value: The development of a multiple item scale," *J. Retail.*, vol. 77, no. 2, pp. 203–220, 2001, [https://doi.org/10.1016/S0022-4359\(01\)00041-0](https://doi.org/10.1016/S0022-4359(01)00041-0)
76. Rintamäki T., Kanto A., Kuusela H., and Spence M. T., "Decomposing the value of department store shopping into utilitarian, hedonic and social dimensions: Evidence from Finland," *Int. J. Retail Distrib. Manag.*, vol. 34, no. 1, pp. 6–24, 2006, <https://doi.org/10.1108/09590550610642792>
77. Sánchez-Fernández R. and Iniesta-Bonillo M. Á., "The concept of perceived value: A systematic review of the research," *Mark. Theory*, vol. 7, no. 4, pp. 427–451, 2007, <https://doi.org/10.1177/1470593107083165>
78. Woodruff R. B., "Customer Value Next Source of Competitive Advantage," *J. Acad. Mark. Sci.*, vol. 25, no. 2, pp. 139–153, 1997.
79. Sheth J. N., Newman B. I., and Gross B. L., "Why we buy what we buy: A theory of consumption values," *J. Bus. Res.*, vol. 22, no. 2, pp. 159–170, 1991, [https://doi.org/10.1016/0148-2963\(91\)90050-8](https://doi.org/10.1016/0148-2963(91)90050-8)
80. Liu H., Meng-Lewis Y., Ibrahim F., and Zhu X., "Superfoods, super healthy: Myth or reality? Examining consumers' repurchase and WOM intention regarding superfoods: A theory of consumption values perspective," *J. Bus. Res.*, vol. 137, pp. 69–88, 2021, <https://doi.org/10.1016/j.jbusres.2021.08.018>
81. Talwar S., Dhir A., Kaur P., and Mäntymäki M., "Why do people purchase from online travel agencies (OTAs)? A consumption values perspective," *Int. J. Hosp. Manag.*, vol. 88, p. 102534, Jul. 2020, <https://doi.org/10.1016/j.ijhm.2020.102534>
82. Karjaluoto H., Glavee-Geo R., Ramdhony D., Shaikh A. A., and Hurlpaul A., "Consumption values and mobile banking services: understanding the urban–rural dichotomy in a developing economy," *Int. J. Bank Mark.*, 2021, <https://doi.org/10.1108/IJBM-03-2020-0129>
83. Zhang Q., Ariffin S. K., Richardson C., and Wang Y., "Influencing factors of customer loyalty in mobile payment: A consumption value perspective and the role of alternative attractiveness," *J. Retail. Consum. Serv.*, vol. 73, 2023, <https://doi.org/10.1016/j.jretconser.2023.103302>
84. Chakraborty D., Kayal G., Mehta P., Nunkoo R., and Rana N. P., "Consumers' usage of food delivery app: a theory of consumption values," *J. Hosp. Mark. Manag.*, vol. 31, no. 5, pp. 601–619, 2022, <https://doi.org/10.1080/19368623.2022.2024476>
85. Khan S. N. and Mohsin M., "The power of emotional value: Exploring the effects of values on green product consumer choice behavior," *J. Clean. Prod.*, vol. 150, pp. 65–74, 2017, <https://doi.org/10.1016/j.jclepro.2017.02.187>

86. Gonçalves, Lourenço T. F., and Silva G. M., "Green buying behavior and the theory of consumption values: A fuzzy-set approach," *J. Bus. Res.*, vol. 69, no. 4, pp. 1484–1491, 2016, <https://doi.org/10.1016/j.jbusres.2015.10.129>
87. Yang H. L. and Lin R. X., "Determinants of the intention to continue use of SoLoMo services: Consumption values and the moderating effects of overloads," *Comput. Human Behav.*, vol. 73, pp. 583–595, 2017, <https://doi.org/10.1016/j.chb.2017.04.018>
88. Chakraborty D., Siddiqui M., Siddiqui A., Paul J., Dash G., and Mas F. D., "Watching is valuable: Consumer views—Content consumption on OTT platforms," *J. Retail. Consum. Serv.*, vol. 70, 2023, <https://doi.org/10.1016/j.jretconser.2022.103148>
89. Oyedele A. and Simpson P. M., "Streaming apps: What consumers value," *J. Retail. Consum. Serv.*, vol. 41, pp. 296–304, 2018, <https://doi.org/10.1016/j.jretconser.2017.04.006>
90. Yim M. Y. C., Chu S. C., and Sauer P. L., "Is Augmented Reality Technology an Effective Tool for E-commerce? An Interactivity and Vividness Perspective," *J. Interact. Mark.*, vol. 39, pp. 89–103, 2017, <https://doi.org/10.1016/j.intmar.2017.04.001>
91. Chahal H. and Kumari N., "Consumer perceived value and consumer loyalty in the healthcare sector," *J. Relatsh. Mark.*, vol. 10, no. 2, pp. 88–112, 2011, <https://doi.org/10.1080/15332667.2011.577729>
92. Tajeddini K. et al., "How self-gratification and social values shape revisit intention and customer loyalty of Airbnb customers," *Int. J. Hosp. Manag.*, vol. 100, 2022, <https://doi.org/10.1016/j.ijhm.2021.103093>
93. Khan A., Sabir R. I., Majid M. B., Javaid M. U., Anwar ul Haq M., and Mehmood H., "Celebrity endorsements, whitening products, and consumer purchase intentions: A review of literature," *J. Cosmet. Dermatol.*, 2022, <https://doi.org/10.1111/jocd.14903> PMID: 35253961
94. Chan K. and Fan F., "Perception of advertisements with celebrity endorsement among mature consumers," *J. Mark. Commun.*, vol. 28, no. 2, pp. 115–131, 2022, <https://doi.org/10.1080/13527266.2020.1843063>
95. Doss S., "The transference of brand attitude: the effect on the celebrity endorser," *J. Manag. Mark. Res.*, vol. 7, no. 1, pp. 1–11, 2011.
96. Cornwell B., Pappu R., and Spry A., "Celebrity endorsement, brand credibility and brand equity," *Eur. J. Mark.*, vol. 45, no. 6, pp. 882–909, 2013.
97. von Felbert A. and Breuer C., "The influence of multiple combinations of celebrity endorsers on consumers' intentions to purchase a sports-related product," *Sport. Bus. Manag. An Int. J.*, 2021, <https://doi.org/10.1108/SBM-03-2021-0030>
98. Ladhari R., Massa E., and Skandrani H., "YouTube vloggers' popularity and influence: The roles of homophily, emotional attachment, and expertise," *J. Retail. Consum. Serv.*, vol. 54, 2020, <https://doi.org/10.1016/j.jretconser.2019.102027>
99. Nouri M., "The Power of Influence: Traditional Celebrity vs Social Media Influencer," *Adv. Writ. Pop Cult. Intersect.*, vol. 176, no. 32, 2018, [Online]. Available: [https://scholarcommons.scu.edu/engl\\_176/32](https://scholarcommons.scu.edu/engl_176/32).
100. Hwang K. and Zhang Q., "Influence of parasocial relationship between digital celebrities and their followers on followers' purchase and electronic word-of-mouth intentions, and persuasion knowledge," *Comput. Human Behav.*, vol. 87, pp. 155–173, 2018, <https://doi.org/10.1016/j.chb.2018.05.029>
101. Jin S. A. A. and Phua J., "Following celebrities' tweets about brands: The impact of Twitter-based electronic word-of-mouth on consumers source credibility perception, buying intention, and social identification with celebrities," *J. Advert.*, vol. 43, no. 2, pp. 181–195, 2014, <https://doi.org/10.1080/00913367.2013.827606>
102. Tafesse W. and Wood B. P., "Followers' engagement with instagram influencers: The role of influencers' content and engagement strategy," *J. Retail. Consum. Serv.*, vol. 58, 2021, <https://doi.org/10.1016/j.jretconser.2020.102303>
103. Kim D. Y. and Kim H. Y., "Influencer advertising on social media: The multiple inference model on influencer-product congruence and sponsorship disclosure," *J. Bus. Res.*, vol. 130, pp. 405–415, 2021, <https://doi.org/10.1016/j.jbusres.2020.02.020>
104. Chen M., Xie Z., Zhang J., and Li Y., "Internet celebrities' impact on luxury fashion impulse buying," *J. Theor. Appl. Electron. Commer. Res.*, vol. 16, no. 6, pp. 2470–2489, 2021, <https://doi.org/10.3390/jtaer16060136>
105. McCormick K., "Celebrity endorsements: Influence of a product-endorser match on Millennials attitudes and purchase intentions," *J. Retail. Consum. Serv.*, vol. 32, pp. 39–45, 2016, <https://doi.org/10.1016/j.jretconser.2016.05.012>
106. Janssen L., Schouten A. P., and Croes E. A. J., "Influencer advertising on Instagram: product-influencer fit and number of followers affect advertising outcomes and influencer evaluations via credibility

- and identification," *Int. J. Advert.*, vol. 41, no. 1, pp. 101–127, 2022, <https://doi.org/10.1080/02650487.2021.1994205>
107. De Veirman M., Cauberghe V., and Hudders L., "Marketing through instagram influencers: The impact of number of followers and product divergence on brand attitude," *Int. J. Advert.*, vol. 36, no. 5, pp. 798–828, 2017, <https://doi.org/10.1080/02650487.2017.1348035>
108. Djafarova E. and Rushworth C., "Exploring the credibility of online celebrities' Instagram profiles in influencing the purchase decisions of young female users," *Comput. Human Behav.*, vol. 68, pp. 1–7, 2017, <https://doi.org/10.1016/j.chb.2016.11.009>
109. Christina, "Maar liefst 86% van de internetgebruikers zegt dat ze influencers niet vertrouwen," *Reputatiefabriek*, 2019.
110. Zhang M. and Wang W., "Characteristics of Online Live-streaming E-commerce: A Follower's Perspective," *Craddle Journal*, vol. 11, no. 2, 2020.
111. Liu H. and Liu L., "A deep analysis in influencers' promotional competence in live-streaming e-commerce," *China Cosmet.*, vol. 12, no. 9, 2019.
112. Issock Issock P. B., Mpinganjira M., and Roberts-Lombard M., "Modelling green customer loyalty and positive word of mouth: Can environmental knowledge make the difference in an emerging market?," *Int. J. Emerg. Mark.*, vol. 15, no. 3, pp. 405–426, 2019, <https://doi.org/10.1108/IJOEM-09-2018-0489>
113. González E. M., Meyer J. H., and Paz Toldos M., "What women want? How contextual product displays influence women's online shopping behavior," *J. Bus. Res.*, vol. 123, pp. 625–641, 2021, <https://doi.org/10.1016/j.jbusres.2020.10.002>
114. Chakraborty D., "Purchase Behavior of Consumers Toward GSAs: A Longitudinal Assessment," *J. Comput. Inf. Syst.*, 2022, <https://doi.org/10.1080/08874417.2022.2123065>
115. Zolkepli I. A., Mukhiar S. N. S., and Tan C., "Mobile consumer behaviour on apps usage: The effects of perceived values, rating, and cost," *J. Mark. Commun.*, vol. 27, no. 6, pp. 571–593, 2021, <https://doi.org/10.1080/13527266.2020.1749108>
116. Guo T., Zhang D., and Raju V., "Exploring the Factors That Influence Consumers' Purchase Intentions in the Context of Live Streaming Commerce," *Int. J. Manag.*, vol. 12, no. 3, pp. 134–147, 2021.
117. Zhang J., Qi S., and Lyu B., "A Receiver Perspective on Knowledge Sharing Impact on Consumer–Brand Relationship in Virtual Communities," *Front. Psychol.*, vol. 12, 2021, <https://doi.org/10.3389/fpsyg.2021.685959> PMID: 34707529
118. Reyes-Menendez A., Palos-Sanchez P., Saura J. R., and Santos C. R., "Revisiting the impact of perceived social value on consumer behavior toward luxury brands," *Eur. Manag. J.*, 2021, <https://doi.org/10.1016/j.emj.2021.06.006>
119. Chen M. and Zhang W. H., "Purchase intention for hydrogen automobile among Chinese citizens: The influence of environmental concern and perceived social value," *Int. J. Hydrogen Energy*, vol. 46, no. 34, pp. 18000–18010, 2021, <https://doi.org/10.1016/j.ijhydene.2020.11.099>
120. Akram U., Junaid M., Zafar A. U., Li Z., and Fan M., "Online purchase intention in Chinese social commerce platforms: Being emotional or rational?," *J. Retail. Consum. Serv.*, vol. 63, 2021, <https://doi.org/10.1016/j.jretconser.2021.102669>
121. Chakraborty D. and Paul J., "Healthcare apps' purchase intention: A consumption values perspective," *Technovation*, 2022, <https://doi.org/10.1016/j.technovation.2022.102481>
122. Lee K., Hyun J., and Lee Y., "Why do and why Don't people consume fast Food?: An application of the consumption value model," *Food Qual. Prefer.*, vol. 99, 2022, <https://doi.org/10.1016/j.foodqual.2022.104550>
123. Thomé K. M., Cappellesso G., and Pinho G. M., "Food consumption values and the influence of physical activity," *Br. Food J.*, vol. 123, no. 3, pp. 943–957, 2020, <https://doi.org/10.1108/BFJ-05-2020-0432>
124. Tanrikulu C., "Theory of consumption values in consumer behaviour research: A review and future research agenda," *Int. J. Consum. Stud.*, vol. 45, no. 6, pp. 1176–1197, 2021, <https://doi.org/10.1111/ijcs.12687>
125. Qian T. Y., Matz R., Luo L., and Xu C., "Gamification for value creation and viewer engagement in gamified livestreaming services: The moderating role of gender in esports," *J. Bus. Res.*, vol. 145, pp. 482–494, 2022, <https://doi.org/10.1016/j.jbusres.2022.02.082>
126. Majeed A., Ahmed I., and Rasheed A., "Investigating influencing factors on consumers' choice behavior and their environmental concerns while purchasing green products in Pakistan," *J. Environ. Plan. Manag.*, vol. 65, no. 6, pp. 1110–1134, 2022, <https://doi.org/10.1080/09640568.2021.1922995>
127. Yoon S. H., Kim H. W., and Kankanhalli A., "What makes people watch online TV clips? An empirical investigation of survey data and viewing logs," *Int. J. Inf. Manage.*, vol. 59, 2021, <https://doi.org/10.1016/j.jinfomgt.2021.102329>

128. Thongmak M., "Determinants of intention to play Pokémon Go," *Heliyon*, vol. 6, no. 12, 2020, <https://doi.org/10.1016/j.heliyon.2020.e03895> PMID: 33364473
129. Zhong Y. et al., "I give discounts, I share information, I interact with viewers: a predictive analysis on factors enhancing college students' purchase intention in a live-streaming shopping environment," *Young Consum.*, 2022, <https://doi.org/10.1108/YC-08-2021-1367>
130. Liu X. and Kim S. H., "Beyond shopping: The motivations and experience of live stream shopping viewers," *2021 13th Int. Conf. Qual. Multimed. Exp. QoMEX 2021*, pp. 187–192, 2021, <https://doi.org/10.1109/QoMEX51781.2021.9465387>
131. El-Adly M. I., "Modelling the relationship between hotel perceived value, customer satisfaction, and customer loyalty," *J. Retail. Consum. Serv.*, vol. 50, pp. 322–332, 2019, <https://doi.org/10.1016/j.jretconser.2018.07.007>
132. Yuan C., Wang S., Liu Y., and Ma J. W., "Factors influencing parasocial relationship in the virtual reality shopping environment: the moderating role of celebrity endorser dynamism," *Asia Pacific J. Mark. Logist.*, 2022, <https://doi.org/10.1108/APJML-06-2021-0402>
133. Kay S., Mulcahy R., and Parkinson J., "When less is more: the impact of macro and micro social media influencers' disclosure," *J. Mark. Manag.*, vol. 36, no. 3–4, pp. 248–278, 2020, <https://doi.org/10.1080/0267257X.2020.1718740>
134. Hill S. R., Troshani I., and Chandrasekar D., "Signalling Effects of Vlogger Popularity on Online Consumers," *J. Comput. Inf. Syst.*, vol. 60, no. 1, pp. 76–84, 2020, <https://doi.org/10.1080/08874417.2017.1400929>
135. Aydin G., Uray N., and Silahtaroglu G., "How to engage consumers through effective social media use-guidelines for consumer goods companies from an emerging market," *J. Theor. Appl. Electron. Commer. Res.*, vol. 16, no. 4, pp. 1–23, 2021, <https://doi.org/10.3390/jtaer16040044>
136. Chen H., Chen H., and Tian X., "The dual-process model of product information and habit in influencing consumers' purchase intention: The role of live streaming features," *Electron. Commer. Res. Appl.*, vol. 53, p. 101150, May 2022, <https://doi.org/10.1016/j.elelap.2022.101150>
137. Hair J. F., Black W. C., Babin B. J., and Anderson R. E., *Multivariate Data Analysis*, 8th ed. United Kingdom: Cengage Learning, 2018.
138. Assarut R. and Eiamkanchanalai S., "Consumption values, personal characteristics and behavioral intentions in mobile shopping adoption," *Trziste*, vol. 27, no. 1, pp. 21–41, 2015.
139. Kaur P., Dhir A., Rajala R., and Dwivedi Y., "Why people use online social media brand communities: A consumption value theory perspective," *Online Inf. Rev.*, vol. 42, no. 2, pp. 205–221, 2018, <https://doi.org/10.1108/OIR-12-2015-0383>
140. Hsieh Y. J., Lin S. M. Y., and Huang L. Y., "Sharing leftover food with strangers via social media: A value perspective based on beliefs-values-behavior framework," *Sustain.*, vol. 13, no. 14, 2021, <https://doi.org/10.3390/su13147663>
141. El-Adly M. I. and Eid R., "Dimensions of the perceived value of malls: Muslim shoppers' perspective," *Int. J. Retail Distrib. Manag.*, vol. 45, no. 1, pp. 40–56, 2017, <https://doi.org/10.1108/IJRDM-12-2015-0188>
142. Chen A., Lu Y., and Wang B., "Customers' purchase decision-making process in social commerce: A social learning perspective," *Int. J. Inf. Manage.*, vol. 37, no. 6, pp. 627–638, 2017, <https://doi.org/10.1016/j.jinfomgt.2017.05.001>
143. Hulland J., Baumgartner H., and Smith K. M., "Marketing survey research best practices: evidence and recommendations from a review of JAMS articles," *J. Acad. Mark. Sci.*, vol. 46, no. 1, pp. 92–108, 2018, <https://doi.org/10.1007/s11747-017-0532-y>
144. Harman H. H., *Modern factor analysis.*, 3rd. Chicago: The University of Chicago Press, 1976.
145. Podsakoff P. M., MacKenzie S. B., and Podsakoff N. P., "Sources of method bias in social science research and recommendations on how to control it," *Annu. Rev. Psychol.*, vol. 63, pp. 539–569, 2012, <https://doi.org/10.1146/annurev-psych-120710-100452> PMID: 21838546
146. Kock N., "Common method bias in PLS-SEM: A full collinearity assessment approach," *Int. J. e-Collaboration*, vol. 11, no. 4, pp. 1–10, 2015, <https://doi.org/10.4018/ijec.2015100101>
147. Hair J. F., Ringle C. M., and Sarstedt M., "PLS-SEM: Indeed a silver bullet," *J. Mark. Theory Pract.*, vol. 19, no. 2, pp. 139–152, 2011, <https://doi.org/10.2753/MTP1069-6679190202>
148. Chinn W. W., "The Partial Least Squares Approach to Structural Equation Modelling," *Mod. Methods Bus. Res.*, vol. 29, no. 2, pp. 295–336, 1998.
149. Fornell C. and Larcker D. F., "Evaluating structural equation models with unobservable variables," *J. Mark. Res.*, vol. XVIII, no. February, pp. 39–50, 1981.



150. Henseler J., Ringle C. M., and Sarstedt M., "A new criterion for assessing discriminant validity in variance-based structural equation modeling," *J. Acad. Mark. Sci.*, vol. 43, no. 1, pp. 115–135, 2015, <https://doi.org/10.1007/s11747-014-0403-8>
151. Hair J., Hopkins L., Georgia M., and College S., "Partial least squares structural equation modeling (PLS-SEM) An emerging tool in business research," *Eur. Bus. Rev.*, vol. 26, no. 2, pp. 106–121, 2014.
152. Cohen J., "Statistical Power Analysis for the Behavioral Sciences," *Stat. Power Anal. Behav. Sci.*, 2013, <https://doi.org/10.4324/9780203771587>
153. Chakraborty D., "Exploring the meteoric rise of online food ordering apps (OFOAs): the moderating role of visibility," *Br. Food J.*, vol. 124, no. 11, pp. 3871–3887, 2022, <https://doi.org/10.1108/BFJ-08-2021-0906>
154. Kaur P., Dhir A., Talwar S., and Ghuman K., "The value proposition of food delivery apps from the perspective of theory of consumption value," *Int. J. Contemp. Hosp. Manag.*, 2021, <https://doi.org/10.1108/IJCHM-05-2020-0477>
155. Kushwah S., Dhir A., and Sagar M., "Ethical consumption intentions and choice behavior towards organic food. Moderation role of buying and environmental concerns," *J. Clean. Prod.*, vol. 236, 2019, <https://doi.org/10.1016/j.jclepro.2019.06.350>
156. Williams P., Soutar G., Ashill N. J., and Naumann E., "Value drivers and adventure tourism: A comparative analysis of Japanese and Western consumers," *J. Serv. Theory Pract.*, vol. 27, no. 1, pp. 102–122, 2017, <https://doi.org/10.1108/JSTP-05-2015-0116>
